# Supplementary material for: Spectroscopic and computational study of the interaction of Pt(ii) pyrrole-imine chelates with human serum albumin
Source: Royal Society of Chemistry journal article supplement (doi:10.1039/d3dt02039h), 2023-01-01
Supplement: d3dt02039h1.pdf [file d3dt02039h1.pdf]

## Supporting Information:

# Spectroscopic and computational study of the interaction of Pt(II) pyrrole-imine chelates with human serum albumin

Sheldon Sookai<sup>a</sup> and Orde Q. Munro<sup>a,b\*</sup>

<sup>a</sup> *Molecular Sciences Institute, School of Chemistry, University of the Witwatersrand, PO WITS 2050, Johannesburg, South Africa*

E-mail: [s.sookai92@gmail.com](mailto:s.sookai92@gmail.com)

<sup>b</sup> *School of Chemistry, University of Leeds, Woodhouse Lane, LS2 9JT, UK*

E-mail: [o.munro@leeds.ac.uk](mailto:o.munro@leeds.ac.uk)

---

## 1. Contents

|                 |                                                                                                     |    |
|-----------------|-----------------------------------------------------------------------------------------------------|----|
| 2.              | General experimental methods.....                                                                   | 4  |
| 3.              | Instruments .....                                                                                   | 4  |
| 3.1.1.          | Crystallography .....                                                                               | 4  |
| 3.1.2.          | General spectroscopy .....                                                                          | 5  |
| 4.              | Compound synthesis .....                                                                            | 5  |
| 4.1.1.          | Ligand synthesis .....                                                                              | 5  |
| 4.1.2.          | Synthesis of Pt(II) bis(pyrrolide-imine) chelates .....                                             | 6  |
| 4.1.3.          | Characterization of bis(pyrrolide-imine) ligands.....                                               | 6  |
| 4.1.4.          | Characterization of Pt(II) bis(pyrrolide-imine) chelates .....                                      | 7  |
| 5.              | Fluorescence and CD spectroscopy .....                                                              | 8  |
| 5.1.1.          | Steady state fluorescence.....                                                                      | 8  |
| 5.1.2.          | UV and UV-vis circular dichroism (CD) .....                                                         | 8  |
| 6.              | Molecular simulations .....                                                                         | 10 |
| 6.1.1.          | DFT Calculations.....                                                                               | 10 |
| 6.1.2.          | Molecular Docking Simulations.....                                                                  | 11 |
| 7.              | Figures.....                                                                                        | 13 |
| 7.1.1.          | Ligand structures.....                                                                              | 13 |
| <b>Fig. S1.</b> | Structures of the bis(pyrrole-imine) ligands synthesized and used in this study to chelate Pt(II).. | 13 |
| 7.1.2.          | NMR, IR, and UV-vis spectra .....                                                                   | 14 |

|                                                                                                                                                                                                                                                                             |    |
|-----------------------------------------------------------------------------------------------------------------------------------------------------------------------------------------------------------------------------------------------------------------------------|----|
| <b>Fig. S2</b> 400 MHz $^1\text{H}$ NMR spectrum of <b>1</b> recorded in $\text{DMSO-}d_6$ at 300 K. ....                                                                                                                                                                   | 14 |
| <b>Fig. S3</b> 101 MHz $^{13}\text{C}$ NMR spectrum of <b>1</b> recorded in $\text{DMSO-}d_6$ at 300 K. ....                                                                                                                                                                | 15 |
| <b>Fig S4.</b> FTIR spectrum of <b>1</b> recorded as a crushed powder sample at 295 K. ....                                                                                                                                                                                 | 15 |
| <b>Fig. S5</b> UV-visible spectrum of <b>1</b> recorded in acetonitrile at 295 K as a function of concentration. ....                                                                                                                                                       | 16 |
| <b>Fig. S6</b> 400 MHz $^1\text{H}$ NMR spectrum of <b>2</b> recorded in $\text{DMSO-}d_6$ at 300 K. ....                                                                                                                                                                   | 16 |
| <b>Fig. S7</b> 101 MHz $^{13}\text{C}$ NMR spectrum of <b>2</b> recorded in $\text{DMSO-}d_6$ at 300 K. ....                                                                                                                                                                | 17 |
| <b>Fig. S8</b> FTIR spectrum of <b>2</b> recorded as a crushed powder sample at 295 K. ....                                                                                                                                                                                 | 17 |
| <b>Fig. S9</b> UV-visible spectrum of <b>2</b> recorded in acetonitrile at 295 K as a function of concentration. ....                                                                                                                                                       | 18 |
| <b>Fig. S10</b> 400 MHz $^1\text{H}$ NMR spectrum of <b>3</b> recorded in $\text{DMSO-}d_6$ at 300 K. ....                                                                                                                                                                  | 19 |
| <b>Fig. S11</b> 101 MHz $^{13}\text{C}$ NMR spectrum of <b>3</b> recorded in $\text{DMSO-}d_6$ at 300 K. ....                                                                                                                                                               | 19 |
| <b>7.1.3.</b> X-ray crystallography.....                                                                                                                                                                                                                                    | 20 |
| <b>Fig. S12</b> (a) View of the ASU of complex <b>1</b> , which comprises three independent molecules supported by hydrogen bonding interactions between the hydroxyl groups of neighbouring molecules in the solid state.....                                              | 20 |
| <b>Fig. S13</b> (a) ASU of <b>2</b> comprising four independent molecules of <b>2</b> (b) Intermolecular $\pi$ -stacking arrangements of neighbouring molecules of <b>2</b> in different ASUs. ....                                                                         | 20 |
| <b>7.1.4.</b> Fluorescence spectroscopy.....                                                                                                                                                                                                                                | 21 |
| <b>Fig. S14</b> Fluorescence emission spectra of HSA (5.0 $\mu\text{M}$ ) recorded as a function of increasing concentration of (a) <b>2</b> and (b) <b>3</b> at 298 K.....                                                                                                 | 21 |
| <b>Fig. S15.</b> Stern–Volmer plots of fluorescence quenching: (a) <b>1</b> ···HSA, (b) <b>2</b> ···HSA and (c) <b>3</b> ···HSA. ....                                                                                                                                       | 22 |
| <b>Fig. S16.</b> Plots of $\log((I_0-I)/I)$ versus $\log([Q])$ for the interaction of HSA with several Pt(II) bis (pyrrolide-imine) chelates (i.e., quenchers, Q): (a) <b>1</b> ···HSA complex, (b) <b>2</b> ···HSA complex, and (c) <b>3</b> ···HSA complex.....           | 23 |
| <b>Fig. S17</b> (a) Double-log plot of the fluorescence quenching data, $\log I_0 - I = \log K + n \log Q$ , for native HSA, HSA•{warfarin}, and HSA•{ibuprofen} as a function of the concentration of <b>1</b> at 298 K in $\text{KH}_2\text{PO}_4$ (50 mM, pH 7.50). .... | 24 |
| <b>Fig. S18</b> (a) Double-log plot of the fluorescence quenching data, $\log I_0 - I = \log K + n \log Q$ , for native HSA, HSA•{warfarin}, and HSA•{ibuprofen} as a function of the concentration of <b>3</b> at 298 K in $\text{KH}_2\text{PO}_4$ (50 mM, pH 7.50). .... | 25 |
| <b>7.1.5.</b> CD spectroscopy.....                                                                                                                                                                                                                                          | 26 |
| <b>Fig. S19</b> Induced CD site displacement assay carried out by measuring the UV CD of HSA (15 $\mu\text{M}$ in 50 mM $\text{KH}_2\text{PO}_4$ buffer, pH 7.5) bound to <b>1</b> (15 $\mu\text{M}$ ) from 280–500 nm.....                                                 | 26 |
| <b>7.1.6.</b> Molecular docking.....                                                                                                                                                                                                                                        | 27 |
| <b>Fig. S20</b> GLIDE XP docking analysis of the binding of <b>1</b> to HSA using the X-ray structure of HSA as the <i>in silico</i> target (PDB code 1HA2). ....                                                                                                           | 27 |

|               |                                                                                                                                                                                                                                                                                                                                                              |    |
|---------------|--------------------------------------------------------------------------------------------------------------------------------------------------------------------------------------------------------------------------------------------------------------------------------------------------------------------------------------------------------------|----|
|               | <b>Fig. S21</b> Illustration of the binding of Pt(II) chelates <b>1</b> and <b>2</b> in subdomain IIIA (Sudlow's drug site II) of HSA as determined by GLIDE XP docking using PDB code 2BXF as the target and a large 40 × 40 × 40-Å <sup>3</sup> grid centred on the coordinates of diazepam. ....                                                          | 28 |
| <b>7.1.7.</b> | Solution stability tests .....                                                                                                                                                                                                                                                                                                                               | 29 |
|               | <b>Fig. S22</b> UV-vis spectra of 20-μM solutions of <b>1</b> (top) and <b>2</b> (bottom) recorded as a function of time in KH <sub>2</sub> PO <sub>4</sub> buffer (50 mM pH 7.5). ....                                                                                                                                                                      | 29 |
|               | <b>Fig. S23</b> UV-vis spectra of a 20 μM solution of <b>3</b> recorded as a function of time in KH <sub>2</sub> PO <sub>4</sub> buffer (50 mM pH 7.5, 20% DMSO (V/V)). ....                                                                                                                                                                                 | 30 |
| <b>7.1.8.</b> | Solvent effects for TD-DFT calculated UV-vis spectra .....                                                                                                                                                                                                                                                                                                   | 31 |
|               | <b>Fig. S24</b> Electronic spectra of <b>1</b> calculated by the TD-DFT method (CAM-B3LYP/def2-QZVP/GD3BJ level of theory) in water and DMSO (PCM solvent continua). ....                                                                                                                                                                                    | 31 |
| 8.            | Tables.....                                                                                                                                                                                                                                                                                                                                                  | 32 |
|               | <b>Table S1.</b> Crystal data and X-ray structure refinement details for Pt(II) bis(pyrrolide-imine) chelates <b>1</b> and <b>2</b> . ....                                                                                                                                                                                                                   | 32 |
|               | <b>Table S2.</b> Selected geometrical parameters (Å, °) for the X-ray structure of <b>1</b> and <b>2</b> . A labelled thermal ellipsoid plot (50% probability surfaces) is included above to aid in reading the tabulated data. ....                                                                                                                         | 33 |
|               | <b>Table S3.</b> Selected geometrical parameters (Å, °) for the X-ray structure of <b>1</b> and <b>2</b> . A labelled thermal ellipsoid plot (50% probability surfaces, H atoms omitted for clarity) is included above to aid in reading the tabulated data. ....                                                                                            | 36 |
|               | <b>Table S4.</b> Selected mean crystallographic and calculated structural and conformational parameters for compounds <b>1</b> and <b>2</b> . ....                                                                                                                                                                                                           | 40 |
|               | <b>Table S5.</b> Selected excited singlet states of TD-DFT calculations for complex <b>1</b> (CAM-B3LYP/DEF2-QZVP/GD3BJ in an acetonitrile solvent continuum). ....                                                                                                                                                                                          | 41 |
|               | <b>Table S6.</b> Selected excited singlet states of TD-DFT calculations for complex <b>2</b> (CAM-B3LYP/DEF2-QZVP/GD3BJ in an acetonitrile solvent continuum). ....                                                                                                                                                                                          | 42 |
|               | <b>Table S7.</b> Summary of GLIDE XP docking scores and selected interaction energy parameters for HSA targets prepared from ligand-free and ligand-bound grids based on geometry-optimized (prepared) structures derived from PDB codes 1HA2 (HSA•{warfarin} complex), 2BXF (HSA•{diazepam} complex), and 2BXG (HSA•{ibuprofen} <sub>2</sub> complex). .... | 43 |
|               | <b>Table S8.</b> Summary of Glide XP docking scores (as in Table S7) and selected interaction distances for HSA targets prepared from ligand-free grids based on geometry-optimized (prepared) structures derived from PDB codes 1HA2 (HSA•{warfarin} complex) and 2BXF (HSA•{diazepam} complex). ....                                                       | 45 |
| 9.            | Extended TD-DFT Electronic Structure Data for <b>1</b> .....                                                                                                                                                                                                                                                                                                 | 47 |
|               | <b>Table S9.</b> Full list of 60 TD-DFT-calculated excited singlet states (CAM-B3LYP/DEF2-QZVP/GD3BJ in a DMSO solvent continuum) for <b>1</b> . Six of the frontier MOs relevant for assignment of the transitions are shown in the first two rows; the last row of the table plots the calculated spectral envelope. ....                                  | 47 |
|               | <b>Table S10.</b> Atomic (Cartesian) coordinates for the DFT-calculated structure of <b>1</b> (CAM-B3LYP/DEF2-QZVP/GD3BJ; DMSO solvent continuum). ....                                                                                                                                                                                                      | 50 |

|                                                                                                                                                         |    |
|---------------------------------------------------------------------------------------------------------------------------------------------------------|----|
| <b>Table S11.</b> Atomic (Cartesian) coordinates for the DFT-calculated structure of <b>1</b> (CAM-B3LYP/DEF2-QZVP/GD3BJ; water solvent continuum)..... | 51 |
| 10. References.....                                                                                                                                     | 52 |

---

## 2. General experimental methods

Pyrrrole-2-carboxaldehyde, 1,3-diaminopropane, 1,3-diaminopropan-2-ol, 1,3-diamino-2,2-dimethyl propane, (R)-(+)-1,2-diaminopropane·2HCl and (S)-(-)-1,2-diaminopropane·2HCl were all purchased from Sigma-Aldrich. All organic solvents were of HPLC grade and were used without any further purification (DMSO, DMF, THF, ethyl acetate, methanol, DCM, and hexane). Buffer reagents included potassium hydroxide ( $\geq 90\%$ ) flakes and potassium monobasic phosphate buffer ( $\text{KH}_2\text{PO}_4 \geq 99$  ACS); these were purchased from Sigma Aldrich along with lyophilized fatty acid-free HSA ( $\geq 97\%$ ).

## 3. Instruments

### 3.1.1. Crystallography

Single crystal X-ray data sets were recorded with a four-circle Bruker D8 Venture X-ray diffractometer equipped with a Photon II CPAD area detector and a three-circle Bruker Apex II X-ray diffractometer employing a CCD area detector; both instruments were fitted with a fine-focus sealed X-ray tube source (Mo anode). Crystals were mounted under Paratone<sup>®</sup> oil on nylon loops (Hampton Research) and the crystals were kept at 173(1) K during data collection (Oxford CryoStream 700). Using Olex2,<sup>1</sup> the structure of **2** was solved with the ShelXT<sup>2</sup> structure solution program (intrinsic phasing) and refined with ShelXL<sup>3</sup> using least squares minimization. Olex2.solve-1.5 and Olex2.refine-1.5 were used to solve and refine the structure of **1**.

During refinement of the X-ray structure of **1**, it became apparent that disordered solvent was present in the lattice. A solvent mask was calculated, and 98 electrons were found in a volume of  $172 \text{ \AA}^3$  in 1 void per unit cell. This is consistent with the presence of 4.50  $\text{H}_2\text{O}$  molecules per asymmetric unit which account for 90 electrons per unit cell. The final X-ray structure model was then refined to completion employing this solvent mask. From the SHELXL refinement, the highest difference peak was  $1.902 e \text{ \AA}^{-3}$  located at the coordinates  $[x, y, z] = [0.5145, 0.6322, 0.4701]$ , precisely  $0.723 \text{ \AA}$  from Pt1C and roughly in the same plane as the Pt(II) ion within the chelate ring. This same residual electron density peak was flagged with a C-level alert in the IUCr *checkCIF* algorithm ( $2.19 e \text{ \AA}^{-3}$ ,  $0.75 \text{ \AA}$  from Pt1C).

During refinement of the X-ray structure of **2**, it became apparent that disordered solvent was present in the lattice. A solvent mask was calculated, and 27 electrons were found in a volume of  $229 \text{ \AA}^3$  in 3 voids per unit cell. This is consistent with the presence of 1.20  $\text{H}_2\text{O}$  molecules per asymmetric unit which account for 25 electrons per unit cell. The final X-ray structure model was then refined to completion employing this solvent mask. The highest difference peak ( $0.961$

$e \text{ \AA}^{-3}$ ) was below the usually employed  $1-e \text{ \AA}^{-3}$  threshold for reporting and located at the coordinates  $[x, y, z] = [0.3771, 0.5585, 0.9631]$ , which is  $1.395 \text{ \AA}$  from Pt1B.

### 3.1.2. General spectroscopy

Proton ( $^1\text{H}$ ) and carbon ( $^{13}\text{C}$ ) NMR spectra were recorded on Bruker Avance III 400 and 300 NMR spectrometers at  $^1\text{H}$  frequencies of 400 MHz and 300 MHz, respectively, and  $^{13}\text{C}$  frequencies of 100 MHz and 75 MHz, respectively. Spectra were recorded at 300 K with 5 mm BBOZ or TBIZ probes. Chemical shifts for both proton and carbon were referenced using the solvent signal. MestReNova (version 14.2.1-27684) was used to analyse all NMR spectra.

FTIR spectra of powder samples were recorded using a Bruker Alpha FTIR spectrometer incorporating a Bruker Platinum diamond ATR sampling accessory. Spectra were analysed using the OPUS software package on the spectrometer (version 7.5).

Electronic spectra were recorded using either a PerkinElmer Lambda 365 double-beam spectrometer connected to a Peltier controller and a Peltier Temp multicell thermostatic cell block or an Analytik Jena Specord210 Plus double-beam instrument fitted with external water circulating thermostatic bath and thermostatic cell holders. The spectral data were analysed with the spectrometer software or Origin Pro 2020. Spectra were recorded as a function of concentration for both characterization and the determination of molar absorptivity constants. Quartz cuvettes with a path length of 10 mm were used.

## 4. Compound synthesis

### 4.1.1. Ligand synthesis

**1,3-bis{[(1E)-1H-pyrrol-2-ylmethylene]amino}propan-2-ol** ( $\text{H}_2(\text{OH})\text{Pyrr}$ ). In brief, the synthesis of  $\text{H}_2(\text{OH})\text{Pyrr}$  involved refluxing pyrrole-2-carboxaldehyde (0.5706 g; 6 mmol) with 1,3-diamino propanol (0.2704 g; 3 mmol) for 2 hours in ethanol (30 mL) in which time the solution changed from colourless to bright orange. The ligand was precipitated out by overnight evaporation of ethanol.

**2,2-dimethyl-N,N'-bis[(1E)-1H-pyrrol-2-ylmethylene]propane-1,3-diamine** ( $\text{H}_2(\text{CH}_3)_2\text{Pyrr}$ ). In brief was synthesized by refluxing pyrrole-2-carboxaldehyde (0.5705 g, 6 mmol), and 1,3-diamino-2,2-dimethyl propane (0.3066 g, 3 mmol) was refluxed in ethanol (30 mL) for one hour. The solution changed from colourless to orange. The ligand was precipitated out by overnight evaporation of the ethanol.

**(1S,2S)-N,N'-bis[(1E)-1H-pyrrol-2-ylmethylene] cyclohexane -1,2-diamine ( $\text{H}_2(-\text{S-cyclohexane})\text{Pyrr}$ )**. The enantiomerically pure ligand was synthesized by a solid-state reaction using the enantiomerically pure (1S, 2S) cyclohexane diamine (0.303 g, 2.65 mmol) with an agate pestle and mortar with pyrrole-2-carboxaldehyde (0.500 g, 5.30 mmol) for between 10 to 15 minutes until a brown oil was formed. The brown oil was dissolved in dichloromethane and

dried with MgSO<sub>4</sub> to remove the water from the condensation reaction. The solution was filtered through celite before being layered with hexane, which yielded thin white rod-shaped crystals.

#### 4.1.2. Synthesis of Pt(II) bis(pyrrolide-imine) chelates

2,2'-{(2-hydroxypropane-1,3-diyl)bis[nitrilo(*E*)methylidene]} bis(pyrrol-1-ido) platinum(II) (**1**) and 2,2'-{(2,2-dimethylpropane-1,3-diyl)bis[nitrilo(*E*)methylidene]} bis(pyrrol-1-ido) platinum(II) (**2**), were prepared in a similar manner.<sup>4</sup> To a round bottom flask either H<sub>2</sub>(OH)Pyrr (100 mg, 0.410 mmol) or H<sub>2</sub>(CH<sub>3</sub>)<sub>2</sub>Pyrr (100 mg, 0.393 mmol) were added to 15 mL of DMF containing 2-mole equivalents of sodium acetate and the solution was heated to 80 °C. Thereafter, K<sub>2</sub>PtCl<sub>4</sub> was dissolved in 15 mL of DMSO, and K<sub>2</sub>PtCl<sub>4</sub> (0.410 mmol, 0.170 g) was added to the H<sub>2</sub>(OH)Pyrr solution, while K<sub>2</sub>PtCl<sub>4</sub> (0.393 mmol, 0.163 g) was similarly added to the H<sub>2</sub>(CH<sub>3</sub>)<sub>2</sub>Pyrr solution. The solutions were then stirred at 80 °C for a further 4 h. A colour change from yellow to dark orange over time indicated spectral changes consistent with metalation and thus the formation of the target Pt(II) bis(pyrrolide-imine) chelates.

**1** was water soluble. Therefore, 100 mL of cold distilled H<sub>2</sub>O was added to the 50% (V/V) DMSO:DMF solution, which was then placed in a separating funnel. **1** was then extracted from the aqueous (DMSO:DMF) layer with ethyl acetate (5 x 250 mL). The solution was then concentrated by rotary evaporation. Red crystals suitable for X-ray diffraction were obtained by slow liquid diffusion of ether into the ethyl acetate solution of **1**.

**2** was precipitated by adding 100 mL of cold distilled H<sub>2</sub>O, and the solution was filtered by gravity filtration leaving a yellow precipitate behind. The yellow precipitate was dried overnight and then dissolved in DCM (~30 mL). DCM was removed by rotary evaporation at 40 °C, upon removal of DCM single red crystals suitable for X-ray diffraction of **2** formed.

#### 4.1.3. Characterization of bis(pyrrolide-imine) ligands

**1,3-bis{[(1*E*)-1*H*-pyrrol-2-ylmethylene]amino}propan-2-ol** (H<sub>2</sub>(OH)Pyrr). The ligand was analysed by <sup>1</sup>H NMR, <sup>13</sup>C NMR, FT-IR, and UV-visible spectroscopy. <sup>1</sup>H NMR (400 MHz, DMSO-*d*<sub>6</sub>-300 K) [δ, ppm]: 3.43 (dd, *J* = 11.7, 6.5 Hz, 2H, CH<sub>2</sub>-N=CH), 3.77 – 3.54 (m, 2H, CH<sub>2</sub>-N=CH), 4.00 – 3.82 (m, 1H, H-7), 6.11 (t, *J* = 3.0 Hz, 2H, H-2), 6.44 (dd, *J* = 3.5, 1.5 Hz, 2H, H-3), 6.87 (t, *J* = 1.9 Hz, 2H, H-1), 8.07 (s, 2H, H-5), 11.34 (s br, 2H, DMSO-*d*<sub>6</sub> exchangeable, H-9). <sup>13</sup>C NMR (101 MHz, DMSO-*d*<sub>6</sub>, 300 K) [δ, ppm]: 65.14 (C-6), 70.69 (C-7), 108.98 (C-2), 113.35 (C-3), 122.03 (C-1), 130.41 (C-4), 152.92 (C-5). IR (KBr pellet, cm<sup>-1</sup>): 3254w (NH, pyrrole), 3088m (CH, imine), 2882 (CH, H-COH), 2859 (CH, CH<sub>2</sub>-N=CH), 1633s (C=N), 1127 (C-O stretch). UV/vis (ethanol) [λ, max, nm; ε, mol<sup>-1</sup> dm<sup>3</sup> cm<sup>-1</sup>]: 289; 3.23 × 10<sup>4</sup>.

**2,2-dimethyl-*N,N'*-bis{[(1*E*)-1*H*-pyrrol-2-ylmethylene]propane-1,3-diamine** (H<sub>2</sub>(CH<sub>3</sub>)<sub>2</sub>Pyrr). The ligand was analysed by <sup>1</sup>H NMR, <sup>13</sup>C NMR, FT-IR, and UV-Visible spectroscopy. <sup>1</sup>H NMR (400 MHz, Chloroform-*d*, 300 K) [δ, ppm]: 0.97 (t, *J* = 4.3 Hz, 6H, H-8), 3.46 (t, *J* = 4.2 Hz, 4H, H-6), 6.26 (p, *J* = 3.2 Hz, 2H, H-2), 6.48 (dt, *J* = 6.6, 3.4 Hz, 2H, H-3), 6.90 (d, *J* = 6.1 Hz, 2H, H-1), 7.99 (t, *J* = 4.2 Hz, 2H, H-5), 9.50 (s br, 2H, H-9). <sup>13</sup>C NMR (101 MHz, Chloroform-*d* 300 K) [δ, ppm]: 24.28

(C-8), 36.96 (C-7), 69.32 (C-6), 109.44 (C-2), 114.28 (C-3), 122.20 (C-1), 130.06 (C-4), 152.17 (C-5). FT-IR (KBr pellet,  $\text{cm}^{-1}$ ): 3130m br  $\nu(\text{CH, imine})$ , 2966m  $\nu(\text{CH, terminal CH}_3)$ , 2852m  $\nu(\text{CH}_2, \text{alkyl})$ , 1635s br  $\nu(\text{C=N})$ . UV-vis (ethanol) [ $\lambda$ , max, nm;  $\epsilon$ ,  $\text{mol}^{-1} \text{dm}^3 \text{cm}^{-1}$ ]: 289;  $3.23 \times 10^4$ .

**(1*S*,2*S*)-*N,N'*-bis[(1*E*)-1*H*-pyrrol-2-ylmethylene] cyclohexane -1,2-diamine** ( $\text{H}_2(-\text{S-cyclohexane})\text{Pyrr}$ ). The ligand was analysed by  $^1\text{H}$  NMR (400 MHz,  $\text{DMSO-}d_6$ , 300 K) [ $\delta$ , ppm]: 1.34 – 1.80 (m, 8H, H-7, and H-8), 3.23 (m, 2H, H-6), 6.01 (t,  $J = 3.0$  Hz, 2H, H-2), 6.31(dd,  $^3J_1 = 3.5$  Hz,  $^3J_2 = 1.4$  Hz, 2H, H-3), 6.76 (t,  $J = 1.9$  Hz, 2H, H-1), 7.94 (s, 2H, H-5), 11.16 (s, 2H, H-9).  $^{13}\text{C}$  NMR (101 MHz,  $\text{DMSO-}d_6$ , 298 K) [ $\delta$ , ppm]: 24.70 (C-8), 33.85 (C-7), 74.09 (C-6), 109.07 (C-2), 113.61 (C-3), 122.08 (C-1), 130.33 (C-4), 151.26 (C-5). UV-vis (acetonitrile) [ $\lambda$ , max, nm;  $\epsilon$ ,  $\text{mol}^{-1} \text{dm}^3 \text{cm}^{-1}$ ]: 289;  $2.37 \times 10^4$ .

#### 4.1.4. Characterization of Pt(II) bis(pyrrolide-imine) chelates

##### **2,2'-[(2-hydroxypropane-1,3-diyl)bis[nitrilo(*E*) methylylidene]] bis(pyrrol-1-ido) platinum(II)**

**(1).**  $^1\text{H}$  NMR (400 MHz,  $\text{DMSO-}d_6$ )  $\delta$  8.19 (s, 1H; H16), 7.20 (s, 2H; H5), 6.65 (d,  $J = 3.8$  Hz, 2H; H1), 6.17 (dd,  $J = 3.8, 1.9$  Hz, 2H; H3), 5.30 (d,  $J = 4.5$  Hz, 1H; H21), 4.03 – 3.95 (m, 2H; H20), 3.82 (d,  $J = 14.0$  Hz, 2H; H18 equatorial), 3.66 (dd,  $J = 14.1, 7.6$  Hz, 2H; H18 axial).  $^{13}\text{C}$  NMR (101 MHz,  $\text{DMSO-}d_6$ )  $\delta$  161.75 (C6), 140.88 (C2), 135.52 (C5), 117.25 (C1), 110.84 (C3), 70.47 (C20), 59.76 (C18). IR (KBr pellet,  $\text{cm}^{-1}$ ): 3083 (CH, imine), 2990 (CH, H-COH), 2904 (CH,  $\text{CH}_2\text{-N=CH}$ ), 1575 (C=N), 1126 (C-O stretch). [ $\lambda_{\text{max}}/\text{nm}$ ,  $\epsilon/\text{mol}^{-1} \text{dm}^3 \text{cm}^{-1}$  ( $\text{CH}_3\text{CN}$ )]: 277,  $1.64 \times 10^4$ ; 303,  $1.91 \times 10^4$ ; 313,  $2.11 \times 10^4$ ; 382,  $1.55 \times 10^4$ .

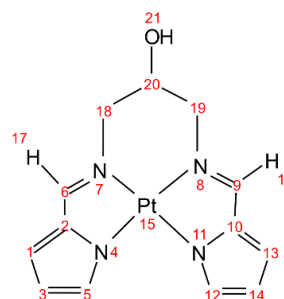

##### **2,2'-[(2,2-dimethylpropane-1,3-diyl)bis[nitrilo(*E*)methylylidene]] bis(pyrrol-1-ido) platinum(II)**

**(2).**  $^1\text{H}$  NMR (400 MHz,  $\text{DMSO-}d_6$ )  $\delta$  8.16 (s, 2H; H1), 7.21 (s, 2H; H5), 6.66 (d,  $J = 3.8$  Hz, 2H; H7), 6.18 (dd,  $J = 3.9, 1.9$  Hz, 2H; H6), 3.48 (s, 4H; H16), 1.05 (s, 6H; H19).  $^{13}\text{C}$  NMR (101 MHz,  $\text{DMSO-}d_6$ )  $\delta$  161.23 (C2), 140.78 (C3), 135.44 (C5), 117.21 (C7), 110.88 (C6), 64.52 (C16), 38.78 (C17), 23.90 (C19). IR (KBr pellet,  $\text{cm}^{-1}$ ): 3085 (CH, imine), 3015m (CH, terminal  $\text{CH}_3$ ), 2933 ( $\text{CH}_2$ , alkyl), 1652 (C=N). IR ( $\text{cm}^{-1}$ ): 2919m br  $\nu(\text{CH, imine})$ , 1566s br  $\nu(\text{C=N})$ . [ $\lambda_{\text{max}}/\text{nm}$ ,  $\epsilon/\text{mol}^{-1} \text{dm}^3 \text{cm}^{-1}$  ( $\text{CH}_3\text{CN}$ )]: 277,  $1.64 \times 10^4$ ; 303,  $1.85 \times 10^4$ ; 313,  $2.06 \times 10^4$ ; 382,  $1.51 \times 10^4$ .

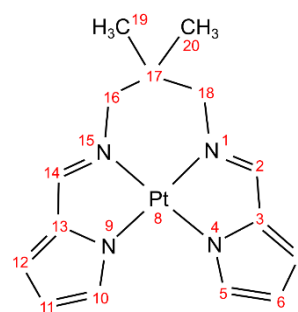

##### **2,2'-[(1*S*,2*S*)-cyclohexane-1,2-diylbis[nitrilo(*E*)methylylidene]]bis(pyrrol-1-ido)platinum(II) (3).**

$^1\text{H}$  NMR (400 MHz,  $\text{DMSO-}d_6$ )  $\delta$  8.15 (s, 2H; H8/H20), 7.10 (s, 3H; H12/H17), 6.64 (d,  $J = 3.8$  Hz, 3H; H10/H15), 6.14 (dd,  $J = 3.9, 1.8$  Hz, 3H; H11/H16), 3.92 (d,  $J = 8.6$  Hz, 2H, H1'/H4' eq), 3.17 (d,  $J = 4.3$  Hz, 2H, H5/H6), 1.75 (d,  $J = 8.9$  Hz, 2H, H2'/3' eq), 1.49 (m, 2H, H2/H3 ax), 1.34 (t,  $J = 10.4$  Hz, 2H, H1/H4 ax).  $^{13}\text{C}$  NMR (101 MHz,  $\text{DMSO-}d_6$ )  $\delta$  152.99 (C8/C20), 144.32 (C12/C17), 135.92 (C9/C19), 117.61 (C10/C15), 109.38 (C11/C16), 73.06 (C5/C6), 26.99 (C1/C4), 23.24

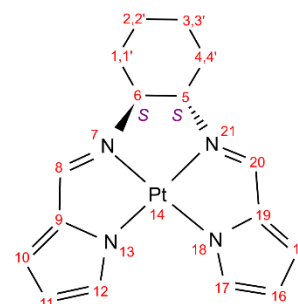

(C2/C3). IR (cm<sup>-1</sup>): 2945m br  $\nu$ (CH, imine), 1564s br  $\nu$ (C=N). [ $\lambda_{\max}/\text{nm}$ ,  $\epsilon/\text{mol}^{-1} \text{ dm}^3 \text{ cm}^{-1}$  (CH<sub>3</sub>CN)]: 277,  $1.89 \times 10^4$ ; 303,  $1.73 \times 10^4$ ; 316,  $1.89 \times 10^4$ ; 382,  $2.04 \times 10^4$ .

## 5. Fluorescence and CD spectroscopy

### 5.1.1. Steady state fluorescence

**Pt(II) bis(pyrrolide-imine) chelates binding to and quenching HSA fluorescence.** Pt(II) bis(pyrrolide-imine) chelates ( $0 - 1.24 \times 10^{-5}$  M in DMSO) were titrated into a solution of HSA ( $5 \times 10^{-6}$  M) in KH<sub>2</sub>PO<sub>4</sub> buffer ( $50 \times 10^{-6}$  M, pH7.5). The excitation slit width was 5 nm and the emission slit width was 10 nm. The protein was excited at 282 nm and the fluorescence emission was measured from 310 nm to 400 nm for all temperatures.

**Fluorescent probe displacement assay.** Warfarin and ibuprofen were used as fluorescent site-specific marker probes for Sudlow's sites I and II, respectively. Steady-state fluorescence spectra were recorded as described above at 298 K using 10 nm excitation and emission bandwidths for warfarin, while 5 nm excitation and 10 nm emission bandwidths were employed for ibuprofen. The fluorophores warfarin and ibuprofen were equilibrated (bound) to HSA (50 mM KH<sub>2</sub>PO<sub>4</sub> buffer, pH 7.50) and were excited at 320 nm and 228 nm, respectively. The emission spectrum was measured in the range of 350 – 500 nm for warfarin and 228 – 450 nm for ibuprofen. The HSA and fluorescence probe concentrations were both used at 5.0  $\mu\text{M}$ . Titrations were performed by increasing the concentrations of the Pt(II) bis(pyrrolide-imine) chelates in the protein-probe solution from 0 to 25.9  $\mu\text{M}$ .

**Correction of fluorescence data.** Inner filter effect (IFE) correction was applied to all fluorescence data using eq. S1.<sup>5</sup>

$$F_{corrected} = F_{observed} * 10^{A_{exc} * d_{exc} + A_{em} * d_{em}} \quad S1$$

Where  $A_{excited}$  and  $A_{emission}$  are the absorbance reading at the excitation and emission wavelengths. While d is the path length of the cuvette.

Further corrections were applied to the concentration of the ligand. i.e., if  $[\text{Ligand}]_{added}$  was not equal to  $[\text{Ligand}]_{free}$ , the free ligand concentration was calculated using eq. S2<sup>6</sup>

$$[\text{Ligand}]_{free} = [\text{Ligand}]_{added} - \frac{F_o}{F_o} - \frac{F}{F_c} * [\text{HSA}] \quad S2$$

### 5.1.2. UV and UV-vis circular dichroism (CD)

**General CD spectroscopy.** Far-UV CD spectra of solutions of HSA ( $3.0 \times 10^{-7}$  mol dm<sup>-3</sup>) in the absence and presence of increasing concentrations (0–40  $\mu\text{M}$ ) of Pt(II) bis(pyrrolide-imine) chelates were recorded with a JASCO J-1500 CD spectrometer equipped with a Peltier temperature controller (25 °C). A scan speed of 100 nm min<sup>-1</sup> was employed for spectral acquisition with a 0.5 nm data pitch and a response time of 2 s. Each spectrum was the average of three scans. Spectra were recorded over a wavelength range of 200–260 nm (0.4 cm pathlength quartz cuvette). All spectra were processed with JASCO Spectral Manager™.



Near-UV region CD spectra (250–310 nm, 1.0-cm pathlength quartz cuvette, 25 °C) and UV-vis CD spectra (300–500 nm, 1.0-cm pathlength quartz cuvette, 25 °C) were recorded similarly to detect induced CD (ICD) signals of the achiral ligands and Pt(II) metal chelates upon their uptake by HSA. Typically, HSA ( $15 \times 10^{-6}$  M) was incubated (25 °C) with one molar equivalent of the Pt(II) bis(pyrrolide-imine) chelates for at least 60 min in 50 mM  $\text{KH}_2\text{PO}_4$  buffer at pH 7.5. A scan speed of  $50 \text{ nm min}^{-1}$  was used with a 0.5-nm data pitch (response time, 2 s) for the near UV-vis CD spectrum and  $100 \text{ nm min}^{-1}$  for the UV-vis CD spectrum; each spectrum was the average of three scans.

**Site displacement assay by UV-vis CD spectroscopy.** Typically, two cuvettes were set up with HSA in buffer ( $15 \times 10^{-6}$  M) and incubated with one molar equivalent of the candidate Pt(II) bis(pyrrolide-imine) chelate for at least 60 min in 50 mM  $\text{KH}_2\text{PO}_4$  buffer at pH 7.5 (25 °C). A scan speed of  $50 \text{ nm min}^{-1}$  was used with a 0.5-nm data pitch (response time, 2 s) for the near-UV CD spectra and  $100 \text{ nm min}^{-1}$  for the UV-vis CD spectra; each spectrum was the average of three scans. Thereafter, two site-specific markers, namely warfarin (Sudlow's site I) or ibuprofen (Sudlow's site II), were titrated into the solution; spectra were recorded as above after each aliquot of titrant added had been equilibrated in the reaction solution for 10 minutes.

**Analysis of CD spectra to determine secondary structure composition.** We utilised the JWMVS-529 Protein Secondary Structure Analysis program, incorporated in JASCO's Spectra Manager™ package, to analyse the secondary structure composition of HSA based on the recorded CD spectra. This program employs a library of 26 protein CD spectra (176–260 nm) provided by JASCO to establish a calibration model.<sup>7</sup> By applying the partial least squares (PLS) method and principal component regression (PCR) techniques,<sup>8</sup> the experimental CD spectra were fitted to the calibration model, allowing for accurate estimation of the fractional composition of  $\alpha$ -helix,  $\beta$ -sheet, turn, and unordered coil structures. Notably, this approach significantly enhances the assessment of  $\beta$ -sheet motifs, which lack strong specific CD marker bands. We opted for these methods over an older algorithm, the JWSSE-513 Protein Secondary Structure Analysis program, offered by JASCO, which employs a classical least squares (CLS) fitting algorithm based on the reference spectra set of Yang et al.<sup>9</sup> Although other methods for protein secondary structure prediction can be found in the literature, we did not utilize them in this study as suitable methods were readily available in JASCO's Spectra Manager™ package on the spectrometer's controlling computer.<sup>10,11</sup>

**Solution stability assays.** To understand the kinetic behaviour of metal chelates **1–3** in solutions of similar or identical composition to those used for protein binding determinations, spectra of the Pt(II) chelates were recorded as a function of time in the absence of the protein. Specifically, the three Pt(II) chelates were diluted from DMSO stock solutions into solutions of  $\text{KH}_2\text{PO}_4$  buffer (50 mM, pH 7.5). The final solution of **1** (hydroxy derivative) had less than 1% (V/V) DMSO after dilution while the solutions of

complexes **2** and **3** each contained 20% (V/V) DMSO after dilution (with [Pt] = 20  $\mu$ M after dilution in all cases). The UV-vis spectra of **1** and **2** were recorded hourly over a period of 24 hours, while spectra for **3** were recorded over a period of 240 min due to precipitation problems. Only data acquired over periods of constant baseline intensity were used for final spectral processing and plotting.

## 6. Molecular simulations

All *in silico* studies were carried out as reported by Sookai and Munro.<sup>12</sup> The methods are reiterated briefly below.

### 6.1.1. DFT Calculations

Simulations were performed to calculate optimized structures, vibrational frequencies, and electronic spectra for Pt(II) chelates **1** and **2** using Gaussian 16 Rev C.01<sup>13</sup> at the CAM-B3LYP<sup>14</sup>/DEF2-QZVP<sup>15</sup> level of theory using the GD3BJ empirical dispersion correction.<sup>16</sup> Structures were also calculated using the SDD basis set.<sup>17</sup> The default geometry convergence criteria in Gaussian 16 were applied. Nuclear shielding tensors were calculated by the default GIAO method<sup>18,19</sup> in Gaussian. Input Pt(II) chelate structures were derived from the X-ray structure atomic coordinates ( $C_1$  symmetry). Simulations were carried out *in vacuo* and in acetonitrile, DMSO, and water solvent continua (SCRF PCM method<sup>20</sup>). GaussView 6.0.16<sup>21</sup> was used for preparing input files and data visualization. GaussSum 3.0 was used to visualize electronic spectra and tabulate transition assignments.<sup>22</sup> All geometry-optimized structures were characterized by positive frequency eigenvalues, indicating that true minima were located on the global potential energy surface for each system.

Time-dependent DFT (TD-DFT) simulations were carried out using the above method (CAM-B3LYP) and basis sets in Gaussian 16 for all small molecules. Typically, 60 excited singlet states were computed to cover the full spectral range (150–900 nm). TD-DFT simulations on protein complexes required the use of the ONIOM<sup>23</sup> method employing two layers: a high or quantum mechanical (QM) layer computed at the CAM-B3LYP/SDD/GD3BJ level of theory and a low layer (molecular mechanics) calculated using the UFF<sup>24</sup> force field. The input structures for the single-point calculations were derived from the best-scoring poses of the ligands of interest docked within the relevant binding site in HSA taken directly from the output of a GLIDE XP<sup>25</sup> docking run with the relevant X-ray structure target (e.g., PDB code: 2BXF). For the QM layer of HSA•**1**, all atoms of the metal chelate were included at the high level. Three amino acid side chains (Ile-388, Phe-403, Leu-407 Arg-485, and Tyr-411) were included in the QM layer around **1** located within Sudlow's site II in the simulations for HSA•**1** to achieve an electronic structure that best-matched experiment, specifically the calculated CD spectrum of the macromolecular complex. This is illustrated in the two boxes below.

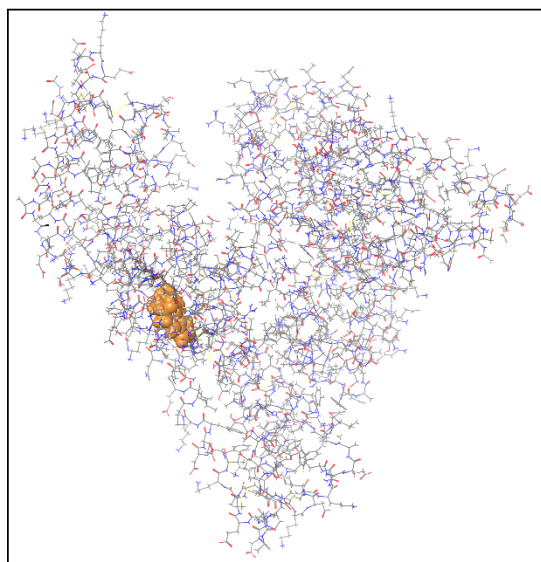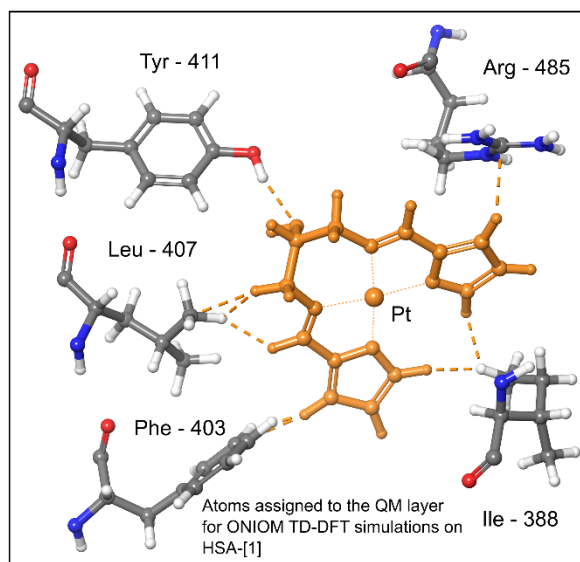

### 6.1.2. Molecular Docking Simulations

**System preparation.** The 2.5-Å and 2.95-Å X-ray crystal structures of HSA in complex with warfarin,<sup>26</sup> diazepam,<sup>27</sup> and ibuprofen<sup>27</sup> were retrieved from the Protein Data Bank (PDB ID codes: 1HA2, 2BXF, and 2BXG). The structure of HSA was pre-processed, minimized, and refined using the Protein Preparation Wizard<sup>28</sup> employed in Schrödinger Suite 2022-3. This step included eliminating crystallographic waters within 5 Å of the ligand binding site, adding missing hydrogen atoms and side chain atoms, as well as assigning the appropriate charge and protonation state of the receptor structure (pH = 7.4) using Prime. Finally, the protein structure was subjected to energy minimization using MacroModel<sup>29</sup> and the S-OPLS force-field<sup>30,31</sup> with a RMSD cut-off value of 0.30 Å to resolve steric clashes among closely spaced residues arising from the addition of hydrogen atoms.

The structures of Pt(II) complexes **1** and **2** for docking inputs were obtained by DFT simulations at the CAM-B3LYP/DEF2-QZVP level of theory in a water solvent continuum (SCRF PCM model) and implementing the GD3BJ empirical dispersion energy correction. Minor adjustments were required to prepare the metal chelate structures for docking with GLIDE. First, the metal was given a +2 charge and the pyrrole nitrogen atoms were each given a -1 charge. Second, the bonds from the four N-donor atoms to the metal ion were assigned bond orders of zero. This step is mandatory as it obviates the need for specific force field parameters involving the metal ion; the coordination geometry is then restrained to remain similar to the input DFT-calculated geometry by GLIDE during optimization and fitting. Lastly, partial charges were assigned to the structures using the S-OPLS force-field.

**Molecular docking.** Docking was performed with GLIDE<sup>25,32,33</sup> to identify the best-fit orientation of the compounds (ligands) into both Sudlow's site I (exemplified by PDB code 1HA2) or Sudlow's site II (PDB code 2BXF) and any sites within ~20 Å of each site.<sup>34</sup> The appropriate hard receptor grid was generated based upon a set of centre coordinates using a cube with dimensions 40 × 40 × 40 Å<sup>3</sup> in each case. The grid box employed was a factor of 4 times larger than the default box size (10 × 10 × 10 Å<sup>3</sup>) and centred on the centroid of the relevant HSA-bound drug (warfarin or diazepam) or protein residue (typically Trp-214). The drug was then automatically removed prior to grid generation. This strategy was adopted because the metal chelates are slightly larger than the typical small molecule drugs bound in Sudlow's sites I and II and we wanted to ensure appropriate sampling of any atypical binding sites close to the main drug-binding pockets.

The metal chelates and free ligand species were then flexibly docked into the relevant binding site grids using the extra precision (XP) docking protocols of GLIDE; aromatic hydrogens were included as H-bond donors. The best-scoring pose for each compound with each PDB structure of native HSA was saved and selected for further analysis.

Docking simulations on HSA targets containing pre-bound drugs (warfarin, diazepam, and ibuprofen) were also performed to evaluate the ability of the protein to take up the metal chelates at binding site locations close to the bound drugs as well as secondary sites located further away. These experiments were performed as described above with grids centred on Trp-214 at the core of the protein. The ligand/drug present in the X-ray structure was retained when setting up the receptor grid. These unconventional experiments were specifically aimed at understanding our fluorescence titration data for HSA pre-equilibrated with warfarin and ibuprofen.

## 7. Figures

### 7.1.1. Ligand structures

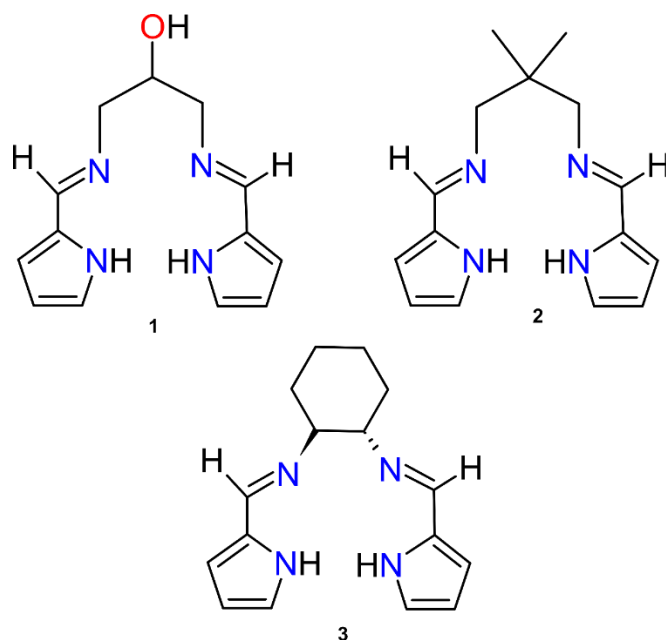

**Fig. S1.** Structures of the bis(pyrrole-imine) ligands synthesized and used in this study to chelate Pt(II): 1,3-bis(*E*){[(1*H*-pyrrol-2-yl)methylidene]amino}propan-2-ol, **1**, (*E,E*)-*N,N'*-(2,2-dimethylpropane-1,3-diyl)bis[1-(1*H*-pyrrol-2-yl)methanimine], **2**, and (*E,E*)-*N,N'*-[(1*S*)-cyclohexane-1,2-diyl]bis[1-(1*H*-pyrrol-2-yl)methanimine], **3**.

## 7.1.2. NMR, IR, and UV-vis spectra

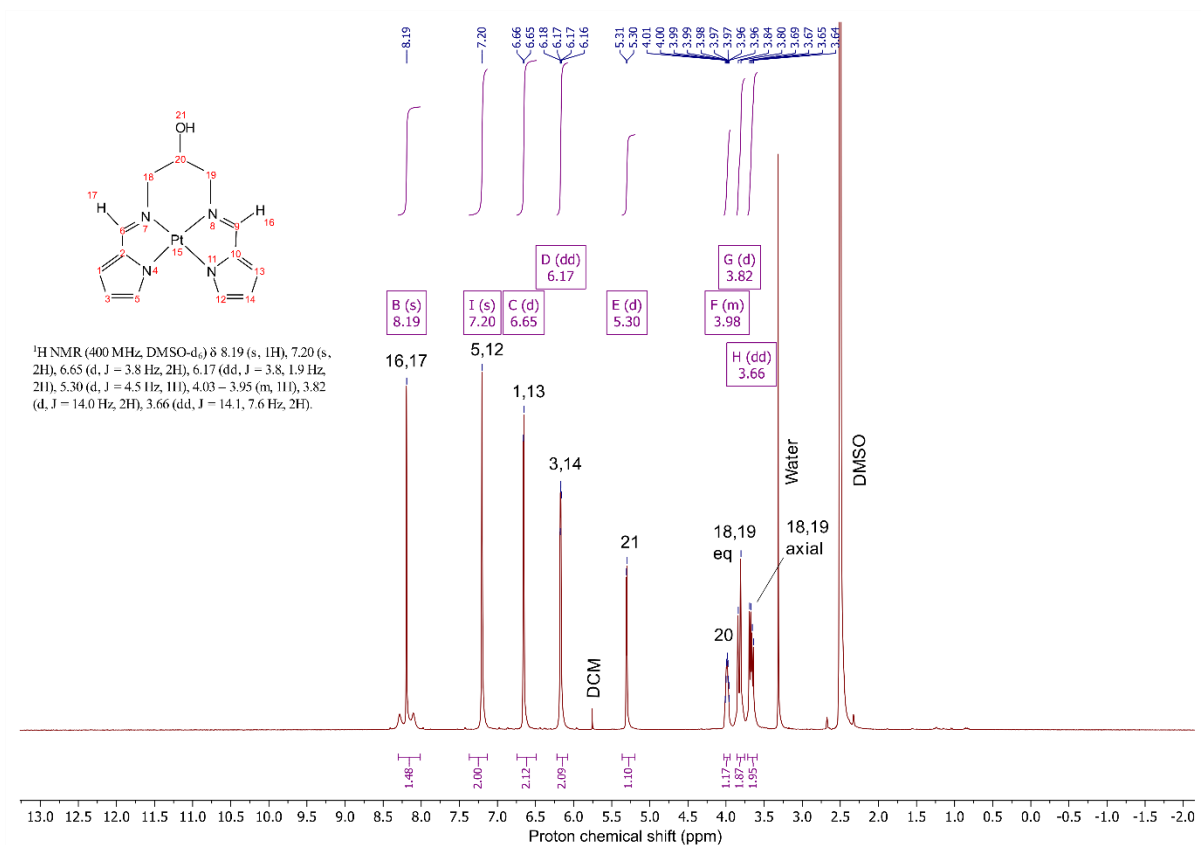

Fig. S2 400 MHz <sup>1</sup>H NMR spectrum of **1** recorded in DMSO-d<sub>6</sub> at 300 K.

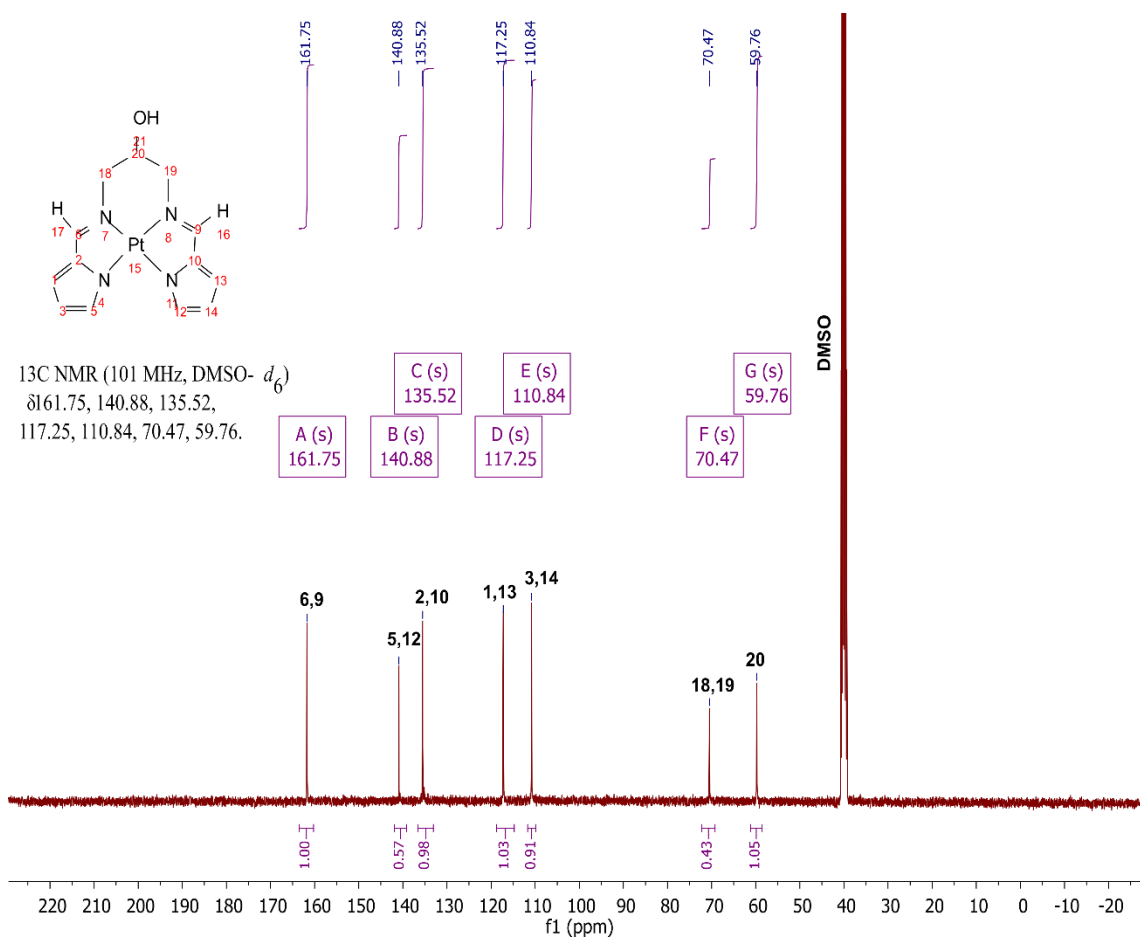

Fig. S3 101 MHz  $^{13}\text{C}$  NMR spectrum of **1** recorded in  $\text{DMSO-}d_6$  at 300 K.

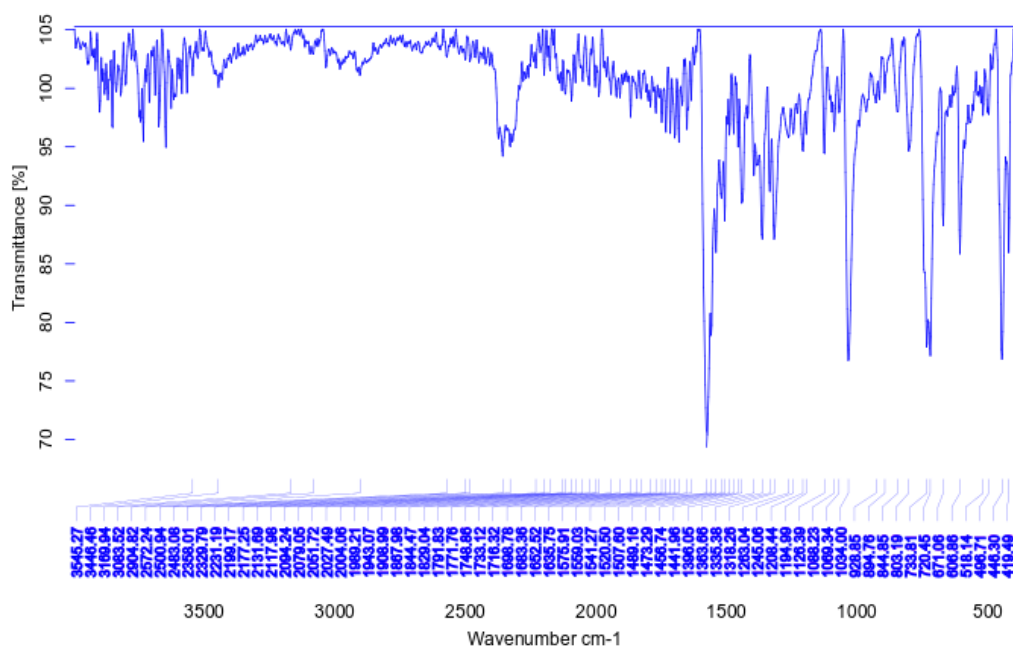

Fig S4. FTIR spectrum of **1** recorded as a crushed powder sample at 295 K.

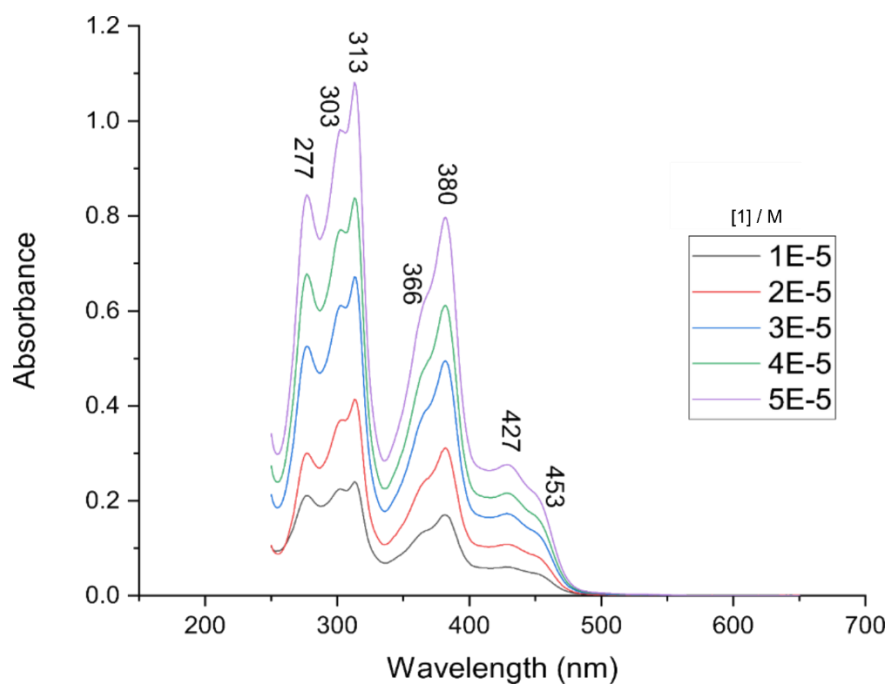

**Fig. S5** UV-visible spectrum of **1** recorded in acetonitrile at 295 K as a function of concentration. The molar absorptivities of key band maximum are reported in Section 4 and were determined from the slopes of Beer-Lambert law plots at the relevant band maxima.

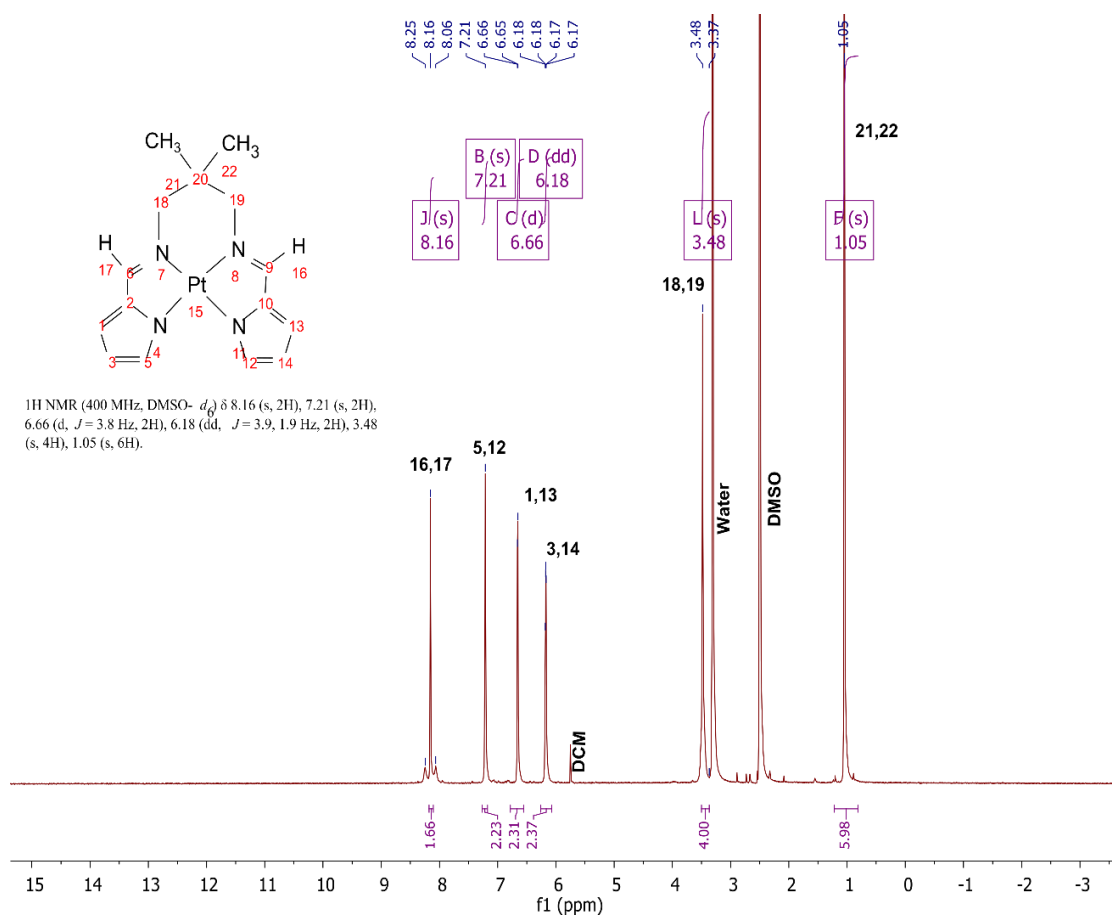

**Fig. S6** 400 MHz <sup>1</sup>H NMR spectrum of **2** recorded in DMSO-*d*<sub>6</sub> at 300 K.



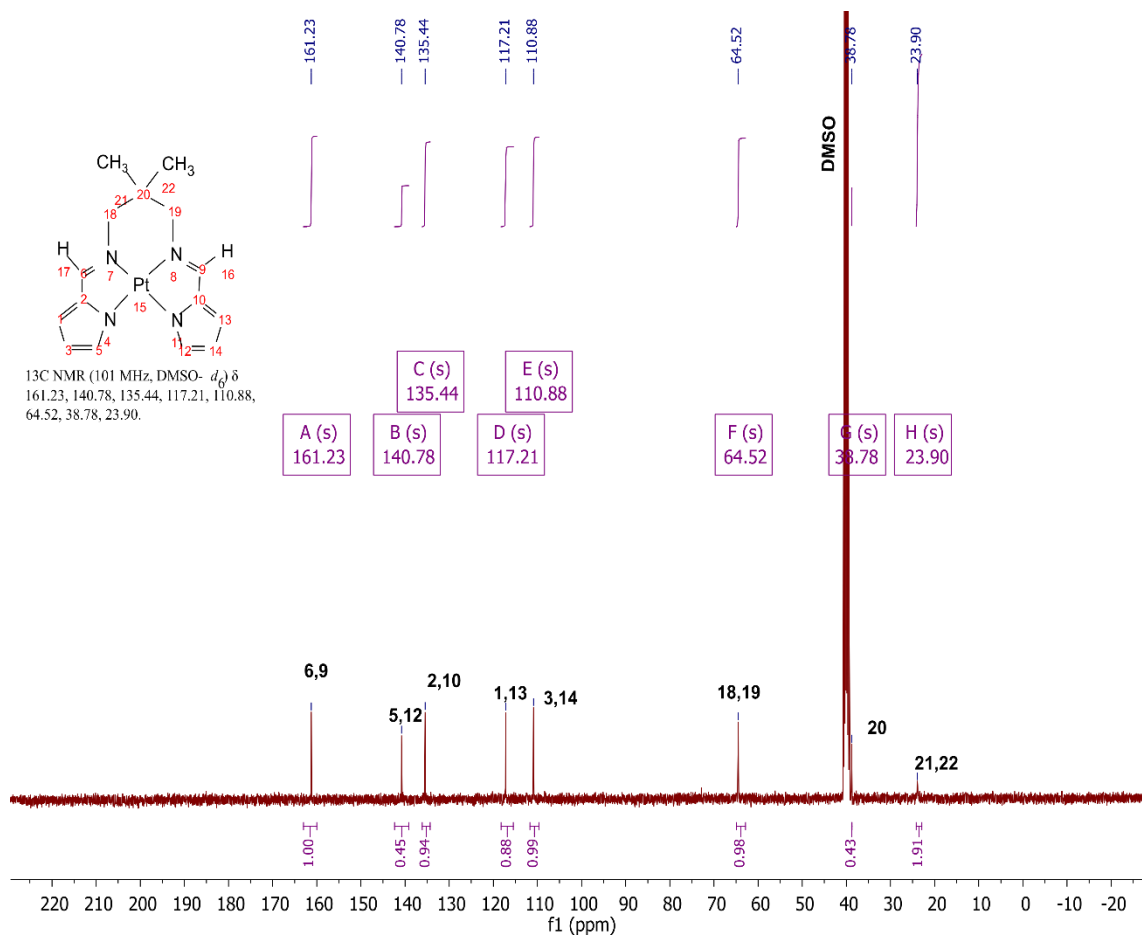

Fig. S7 101 MHz <sup>13</sup>C NMR spectrum of **2** recorded in DMSO-*d*<sub>6</sub> at 300 K.

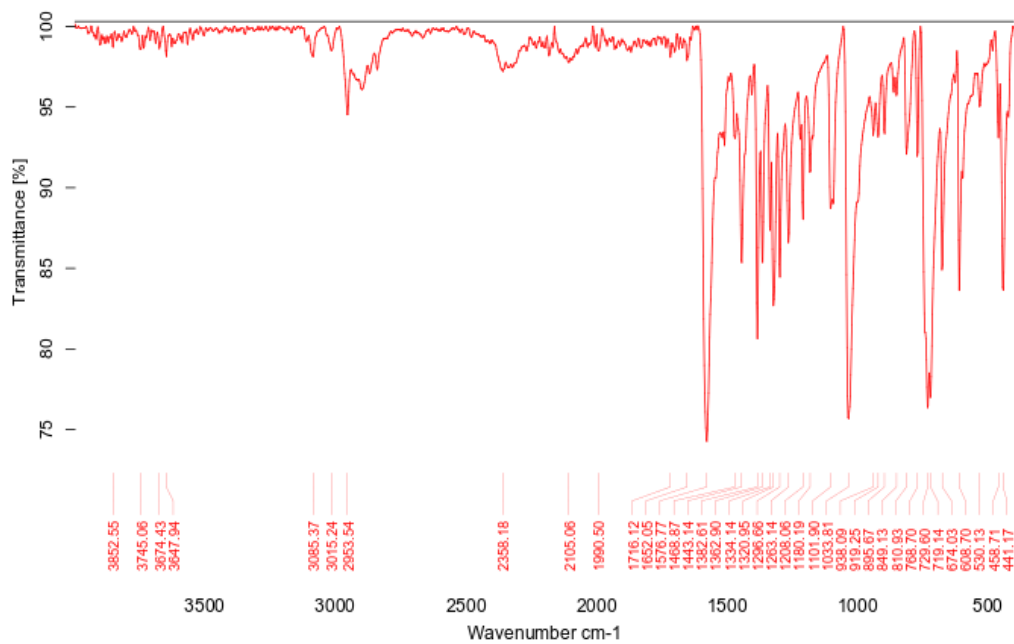

Fig. S8 FTIR spectrum of **2** recorded as a crushed powder sample at 295 K.

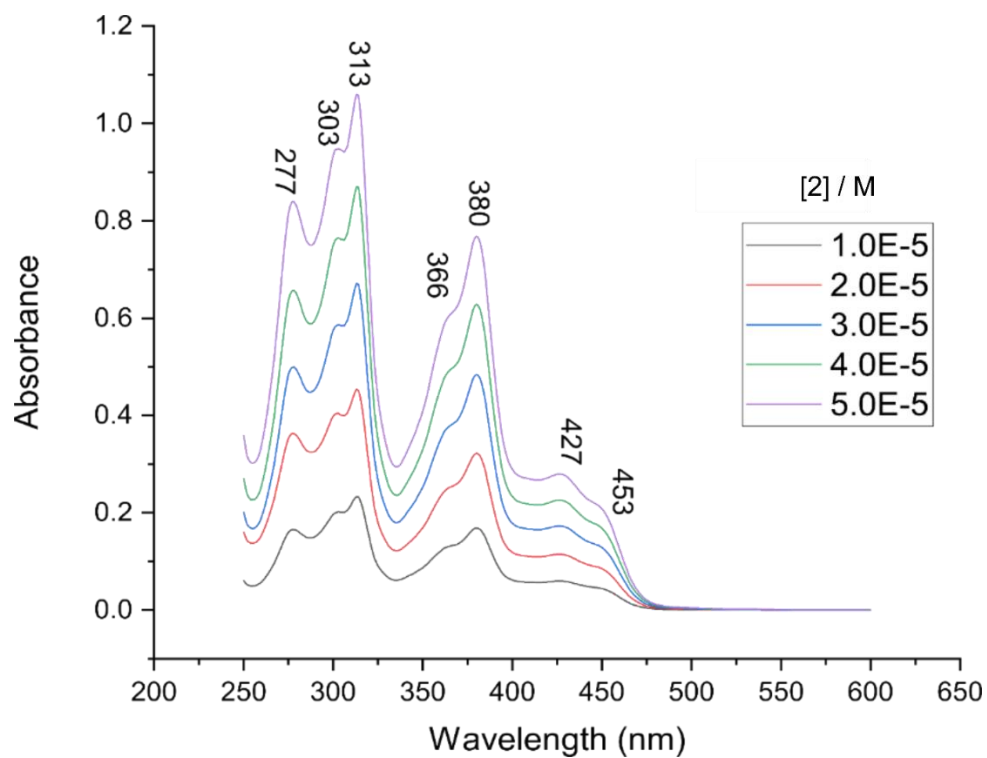

**Fig. S9** UV-visible spectrum of **2** recorded in acetonitrile at 295 K as a function of concentration. The molar absorptivities of key band maximum are reported in Section 4 and were determined from the slopes of Beer-Lambert law plots at the relevant band maxima.

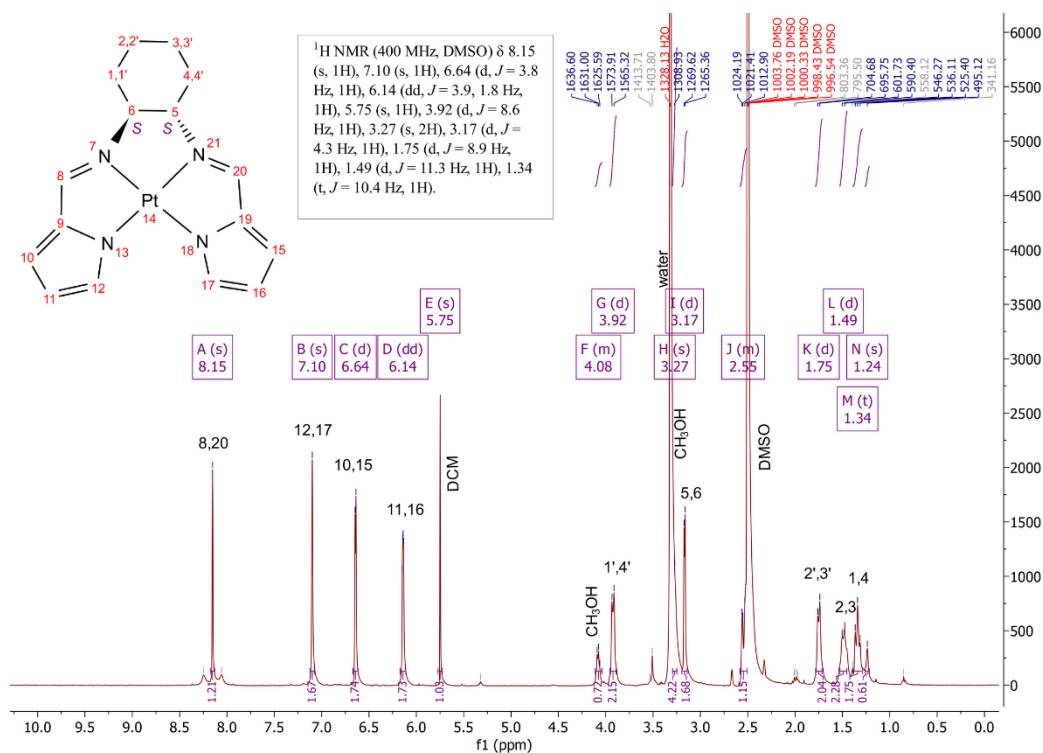

**Fig. S10** 400 MHz <sup>1</sup>H NMR spectrum of **3** recorded in DMSO-*d*<sub>6</sub> at 300 K. This compound is known;<sup>4</sup> the spectral data here briefly confirm the structure of the compound and its purity.

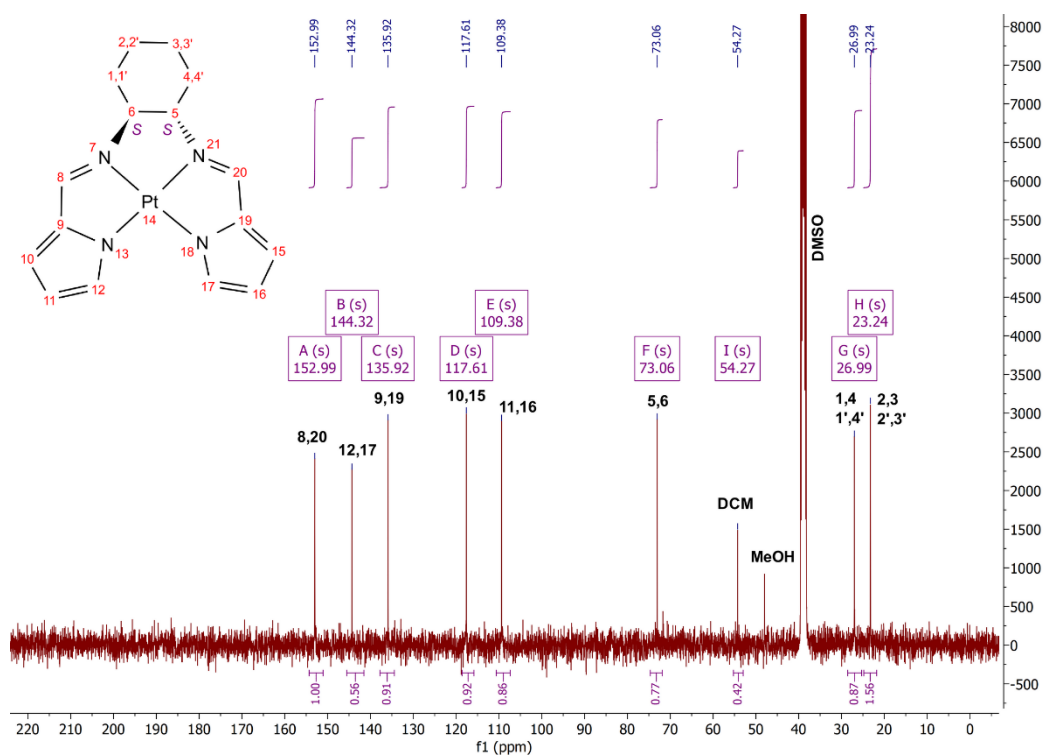

**Fig. S11** 101 MHz <sup>13</sup>C NMR spectrum of **3** recorded in DMSO-*d*<sub>6</sub> at 300 K.

### 7.1.3. X-ray crystallography

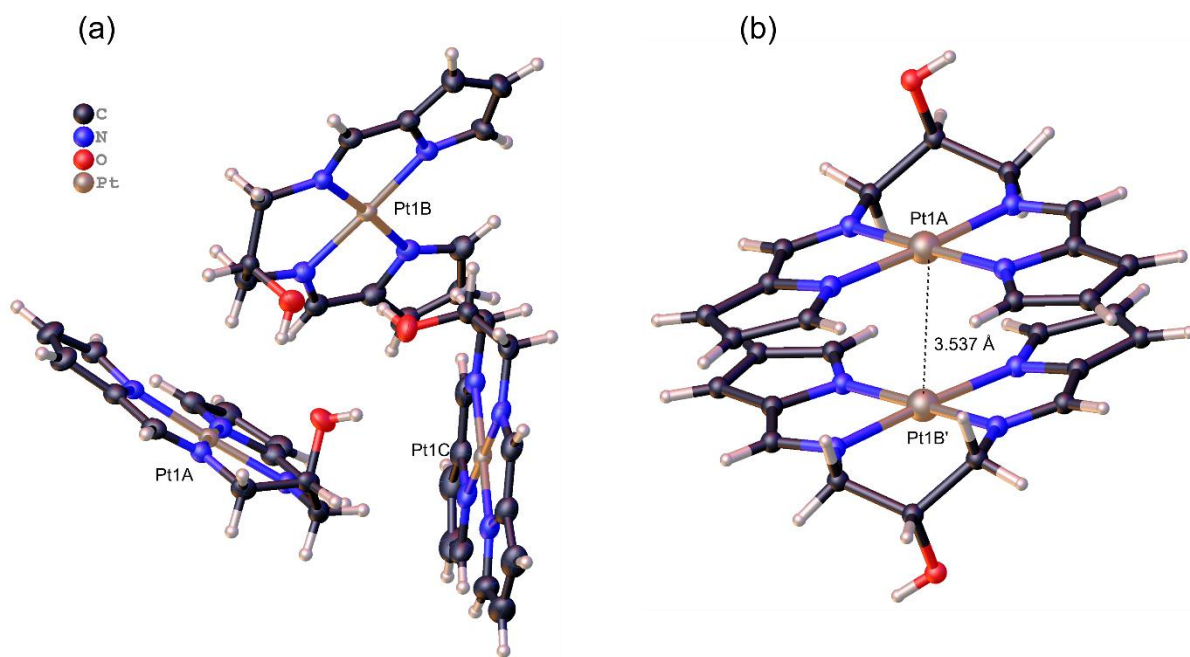

**Fig. S12** (a) View of the ASU of complex **1**, which comprises three independent molecules supported by hydrogen bonding interactions between the hydroxyl groups of neighbouring molecules in the solid state. The hydroxyl groups act as both hydrogen bond donors and acceptors. (b) Intermolecular  $\pi$ -stacking arrangements of neighbouring molecules of **1** in adjacent ASUs. The Pt...Pt distances were measured between the pair of Pt(II) ions of a centrosymmetric inversion pair.

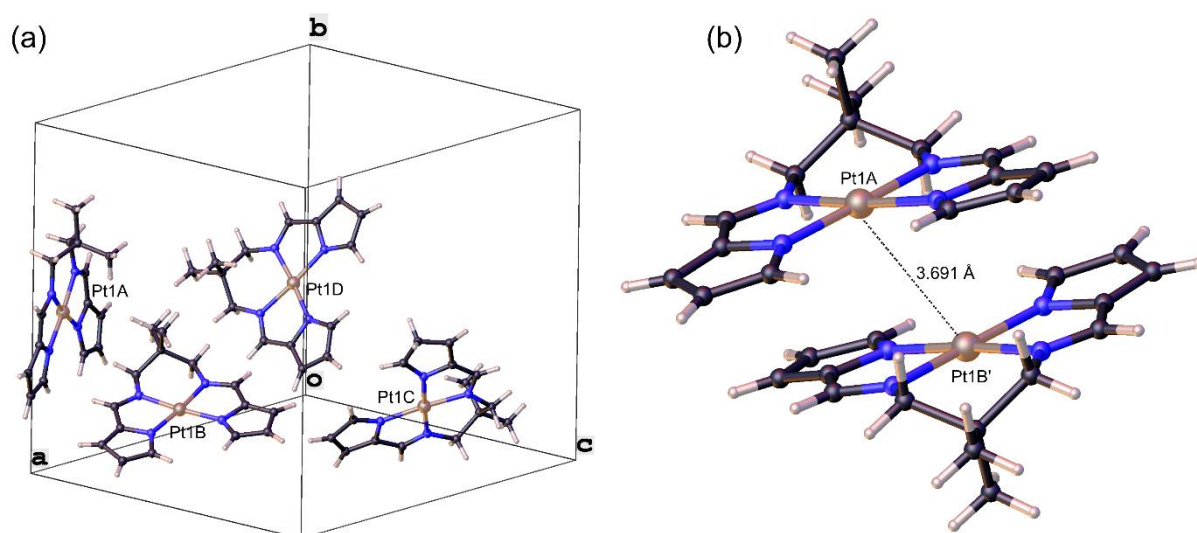

**Fig. S13** (a) ASU of **2** comprising four independent molecules of **2** (b) Intermolecular  $\pi$ -stacking arrangements of neighbouring molecules of **2** in different ASUs. The Pt...Pt distances were measured between the pair of Pt(II) ions of a centrosymmetric inversion pair.

### 7.1.4. Fluorescence spectroscopy

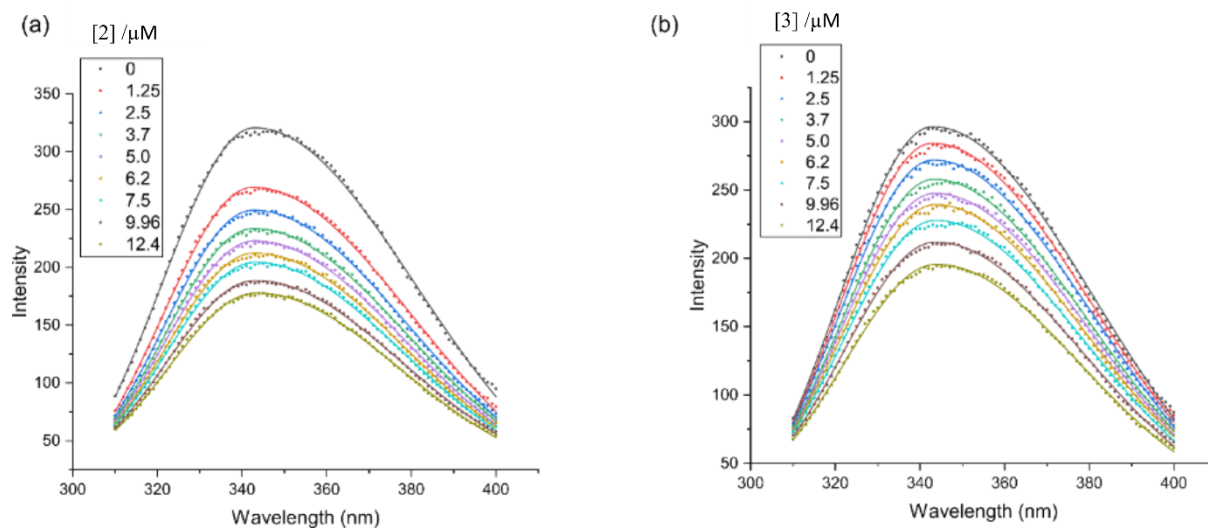

**Fig. S14** Fluorescence emission spectra of HSA (5.0  $\mu\text{M}$ ) recorded as a function of increasing concentration of (a) **2** and (b) **3** at 298 K. Both Pt(II) bis(pyrrolide-imine) chelates had a concentration range of 0 – 12.4  $\mu\text{M}$ . The emission spectra confirm that the Pt(II) complexes quench the intrinsic (i.e., Trp-214) fluorescence of HSA upon binding.

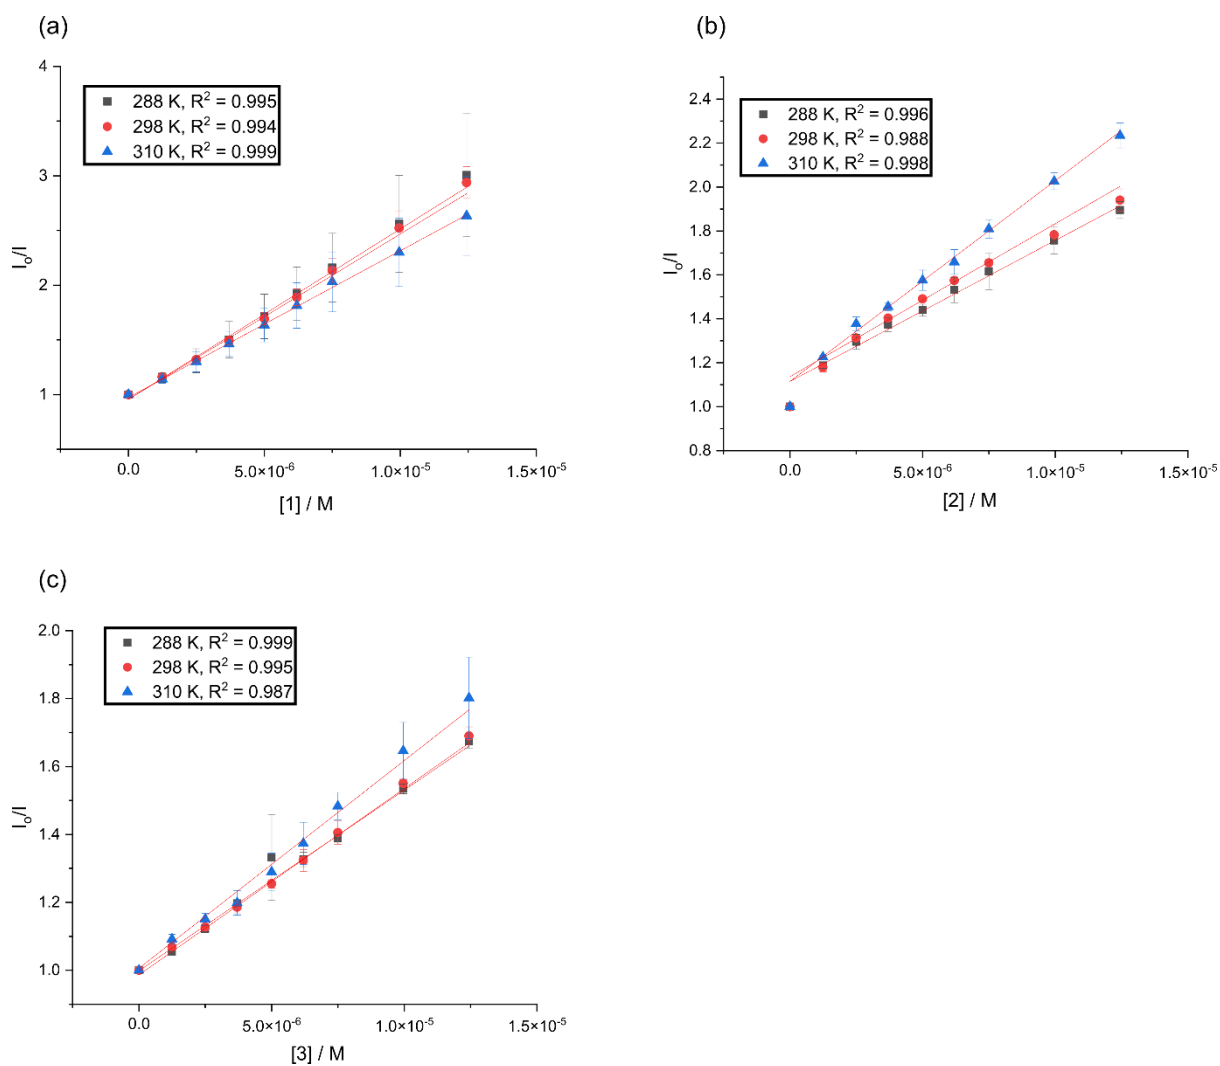

**Fig. S15.** Stern–Volmer plots of fluorescence quenching: (a) 1...HSA, (b) 2...HSA and (c) 3...HSA. All three Pt(II) bis (pyrrylid-imine) chelates were recorded at three different temperatures (■ 288 K, ● 298 K, and ▲ 310 K). The relevant concentrations for the titrations were: [HSA] = 5.0  $\mu$ M with 1–3 ranging from 0 – 12.4  $\mu$ M at pH 7.50 in 50 mM  $\text{KH}_2\text{PO}_4$  buffer.

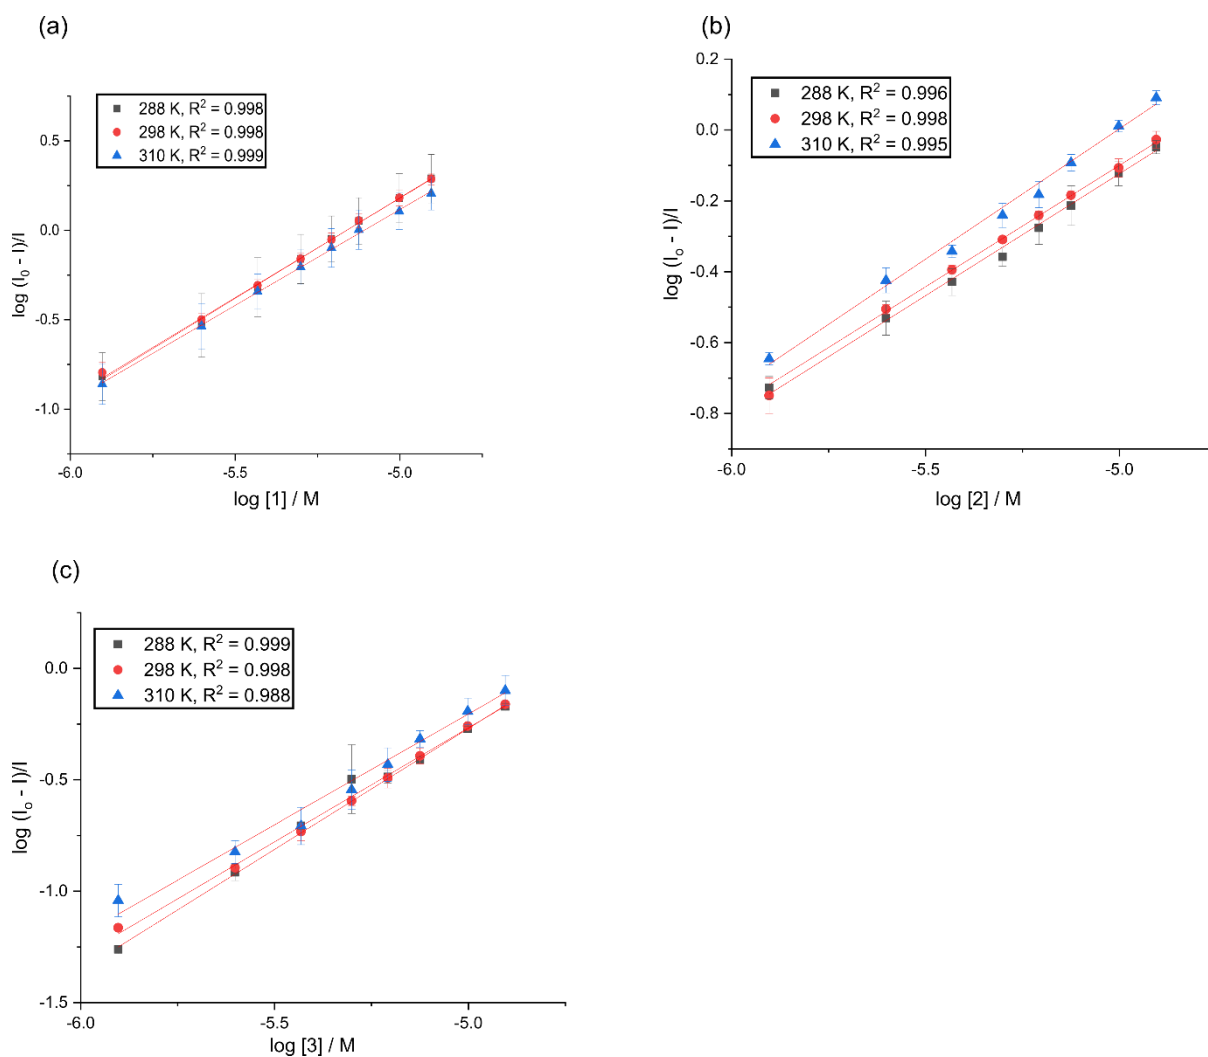

**Fig. S16.** Plots of  $\log((I_0 - I)/I)$  versus  $\log([Q])$  for the interaction of HSA with several Pt(II) bis (pyrrolide-imine) chelates (i.e., quenchers, Q): (a) **1**...HSA complex, (b) **2**...HSA complex, and (c) **3**...HSA complex. The affinity constants are determined from the intercepts of the graphs and the stoichiometry from the slopes. Data for the three Pt(II) bis (pyrrolide-imine) chelates were recorded at three different temperatures ( $\blacksquare$  288 K,  $\bullet$  298 K, and  $\blacktriangle$  310 K). The relevant concentrations for the titrations were:  $[HSA] = 5.0 \mu M$  with **1–3** ranging from 0 – 12.4  $\mu M$  at pH 7.50 in 50 mM  $KH_2PO_4$  buffer.

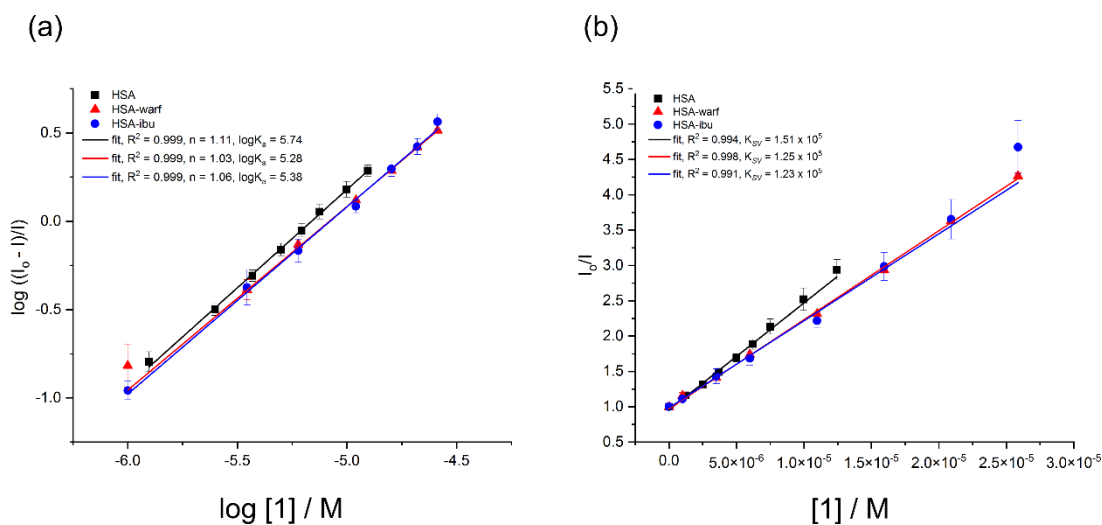

**Fig. S17** (a) Double-log plot of the fluorescence quenching data,  $\log\left(\frac{I_0 - I}{I}\right) = \log K + n \log[Q]$ , for native HSA, HSA•{warfarin}, and HSA•{ibuprofen} as a function of the concentration of **1** at 298 K in  $\text{KH}_2\text{PO}_4$  (50 mM, pH 7.50). This is to enable the measurement of  $\log K_a$  (the association constant for the Pt(II) chelate with the macromolecule target,  $K_a$ ) and the reaction stoichiometry ( $n$ ). The excitation and emission wavelengths for the fluorophore probes were: (i) Trp-214 (native HSA),  $\lambda^{\text{ex}} = 295$  nm,  $\lambda^{\text{em}} = 343$  nm; (ii) Warfarin (HSA-Warf),  $\lambda^{\text{ex}} = 320$  nm,  $\lambda^{\text{em}} = 382$  nm, and (iii) Ibuprofen (HSA-Ibu),  $\lambda^{\text{ex}} = 228$  nm,  $\lambda^{\text{em}} = 332$  nm. (b) Stern–Volmer (SV) plot for native HSA, HSA•{warfarin}, and HSA•{ibuprofen} as a function of the concentration of **1** at 298 K in  $\text{KH}_2\text{PO}_4$  (50 mM, pH 7.50). The plots are linear with an intercept of 1.0 when static quenching is dominant. Overall, the plots show that **1** binds with an approximately 1:1 mole ratio to native HSA. The presence of either drug marginally decreases the binding of **1** as the affinity constants marginally decrease. A possible interpretation is that **1** can bind (half-saturate) to both subdomain IIA and IIIA (Sudlow’s site I and II) of the native protein, but that when either warfarin or ibuprofen is located in one of these two sites, the reciprocal site is fully saturated. Alternatively, warfarin or ibuprofen may alter the protein conformation to enable the uptake of an additional half-equivalent of **1** at a third site. Such additional drug binding sites are known for HSA and exist in subdomains IIIB (propofol binding site, close to site II in subdomain IIIA) and IB (hemin binding site).



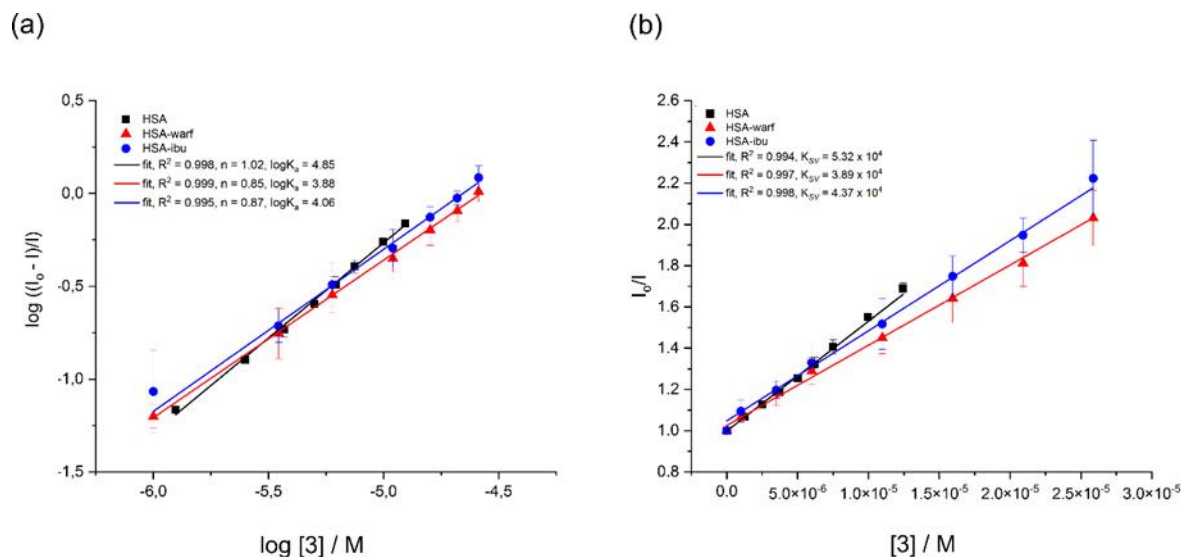

**Fig. S18** (a) Double-log plot of the fluorescence quenching data,  $\log\left(\frac{I_0-I}{I}\right) = \log K + n \log [Q]$ , for native HSA, HSA•{warfarin}, and HSA•{ibuprofen} as a function of the concentration of **3** at 298 K in  $\text{KH}_2\text{PO}_4$  (50 mM, pH 7.50). This is to enable the measurement of  $\log K_a$  (the association constant for the Pt(II) chelate with the macromolecule target,  $K_a$ ) and the reaction stoichiometry ( $n$ ). The excitation and emission wavelengths for the fluorophore probes were: (i) Trp-214 (native HSA),  $\lambda^{\text{ex}} = 295$  nm,  $\lambda^{\text{em}} = 343$  nm; (ii) Warfarin (HSA-Warf),  $\lambda^{\text{ex}} = 320$  nm,  $\lambda^{\text{em}} = 382$  nm, and (iii) Ibuprofen (HSA-Ibu),  $\lambda^{\text{ex}} = 228$  nm,  $\lambda^{\text{em}} = 332$  nm. (b) Stern–Volmer (SV) plot for native HSA, HSA•{warfarin}, and HSA•{ibuprofen} as a function of the concentration of **3** at 298 K in  $\text{KH}_2\text{PO}_4$  (50 mM, pH 7.50). The plots are linear with an intercept of 1.0 when static quenching is dominant. Overall, the plots show that **3** binds with an approximately 1:1  $n$  value to native HSA. At no point does **3** displace either warfarin or ibuprofen from HSA•{warfarin}, and HSA•{ibuprofen}; however, the presence of either drug marginally decreases the binding of **3** as the affinity constants marginally decrease. A possible interpretation is that **3** can bind (half-saturate) to both subdomain IIA and IIIA (Sudlow’s site I and II) of the native protein, but that when either warfarin or ibuprofen is located in one of these two sites, the reciprocal site is fully saturated. Alternatively, warfarin or ibuprofen may alter the protein conformation to enable the uptake of an additional half-equivalent of **3** at a third site. Such additional drug binding sites are known for HSA and exist in subdomains IIIB (propofol binding site, close to site II in subdomain IIIA) and IB (hemin binding site).

### 7.1.5. CD spectroscopy

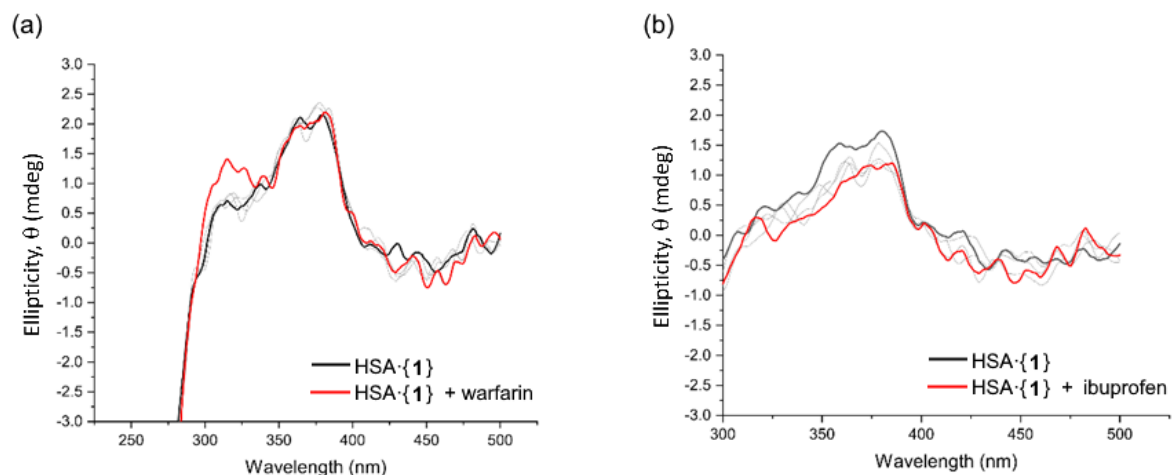

**Fig. S19** Induced CD site displacement assay carried out by measuring the UV CD of HSA (15  $\mu\text{M}$  in 50 mM  $\text{KH}_2\text{PO}_4$  buffer, pH 7.5) bound to **1** (15  $\mu\text{M}$ ) from 280–500 nm. Site-specific markers (a) warfarin and (b) ibuprofen were titrated into the HSA·{**1**} solution to determine the Pt(II) chelate's preferred binding site. Both site-specific markers were titrated in to give concentrations of 4.1, 8.3, 12.5, and 20.1  $\mu\text{M}$  (the grey lines represent 4.1, 8.3, and 12.5  $\mu\text{M}$ ). The spectra were smoothed using a Lowess function (0.07 span). From Fig. S19b, it is clear that only partial displacement of **1** is induced by the incoming probe ligand ibuprofen, while Fig. S19a indicates that incoming warfarin minimally perturbs the spectrum of HSA·{**1**} and evidently cannot displace **1** from the protein.

## 7.1.6. Molecular docking

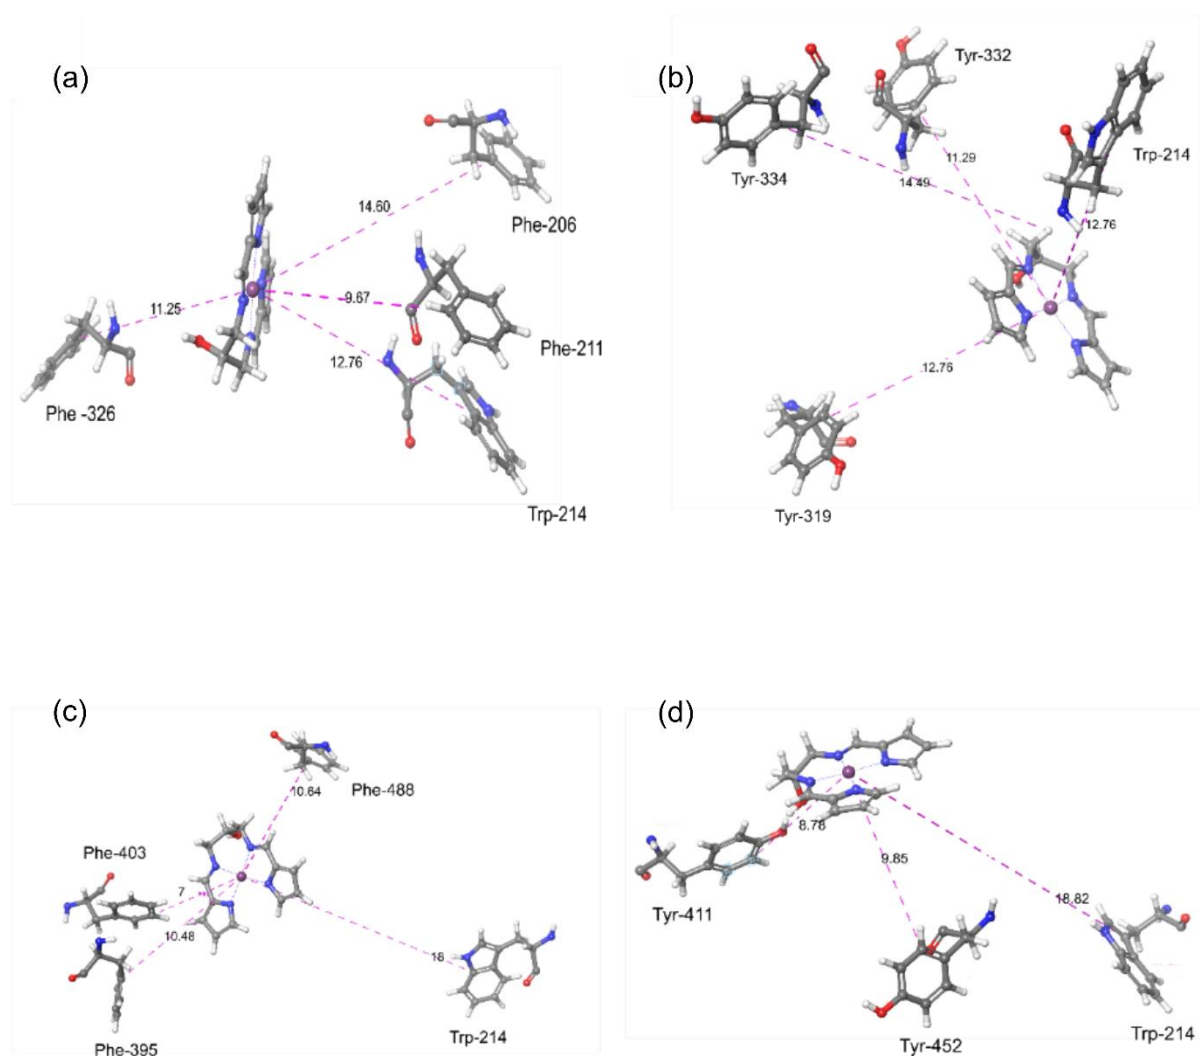

**Fig. S20** GLIDE XP docking analysis of the binding of **1** to HSA using the X-ray structure of HSA as the *in silico* target (PDB code 1HA2). A large target grid was generated for macromolecular ligand docking at the warfarin site (with warfarin removed), spanning  $40 \times 40 \times 40 \text{ \AA}^3$ , to search for secondary binding sites radiating out (to  $\sim 20 \text{ \AA}$ ) from warfarin's location in subdomain IIA. The image panels show selected phenylalanine and tyrosine residues, respectively, that are closest to the best poses for **1** (a summary of the aromatic residues for **2** is given in Table S8). Distances are in  $\text{\AA}$  units. The near-UV CD spectra for HSA•**1** and HSA•**2** are shown in Figs. 7a and b of in the main text suggest that these ligands perturb Tyr and Phe chromophores in addition to Trp-214 in HSA. The above docking results support the experimental data: **2** binds in tyrosine- and phenylalanine-rich pockets within HSA with roughly the same docking score.

(a)

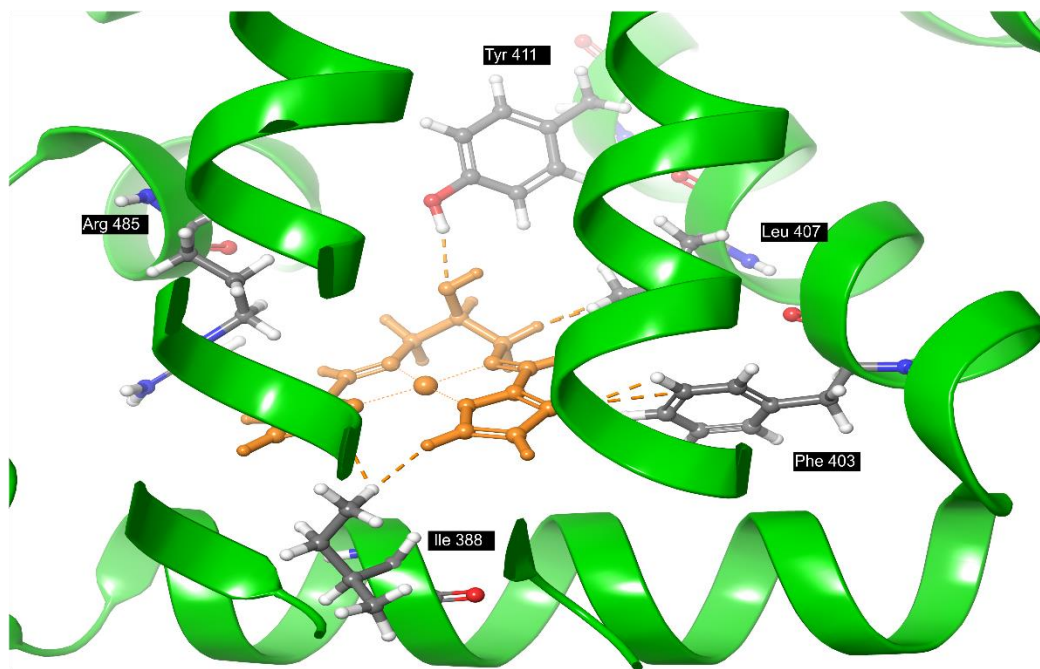

(b)

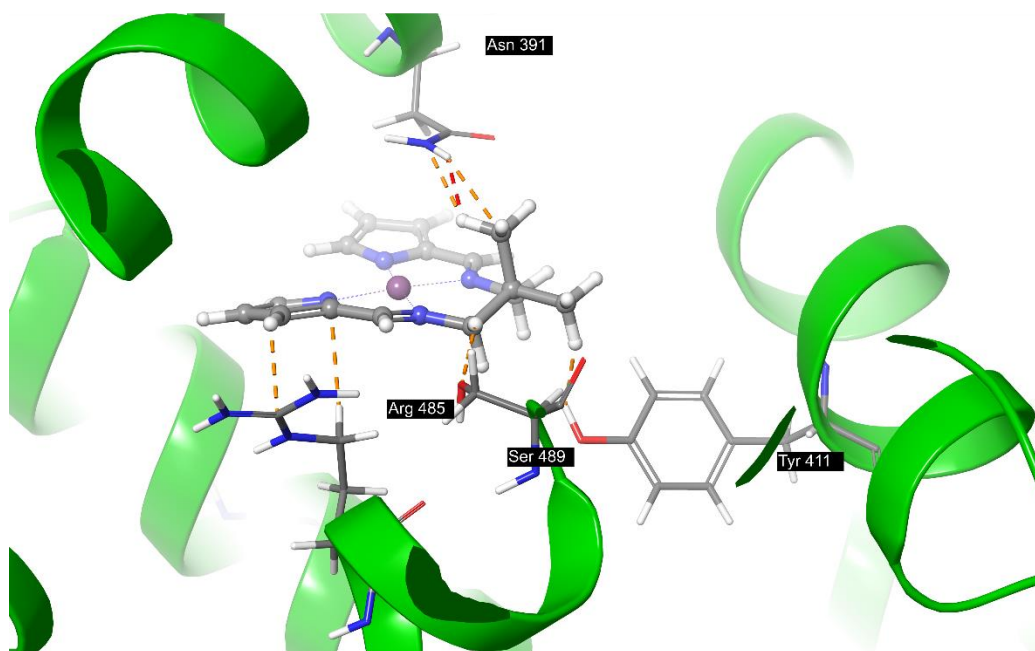

**Fig. S21** Illustration of the binding of Pt(II) chelates **1** and **2** in subdomain IIIA (Sudlow's drug site II) of HSA as determined by GLIDE XP docking using PDB code 2BXF as the target and a large  $40 \times 40 \times 40$ -Å<sup>3</sup> grid centred on the coordinates of diazepam. The *in silico* model supports the observed data suggesting both Pt(II) chelates **1** and **2** bind to Sudlow's site II (See Figs. 7 and 9 of the main paper.)

### 7.1.7. Solution stability tests

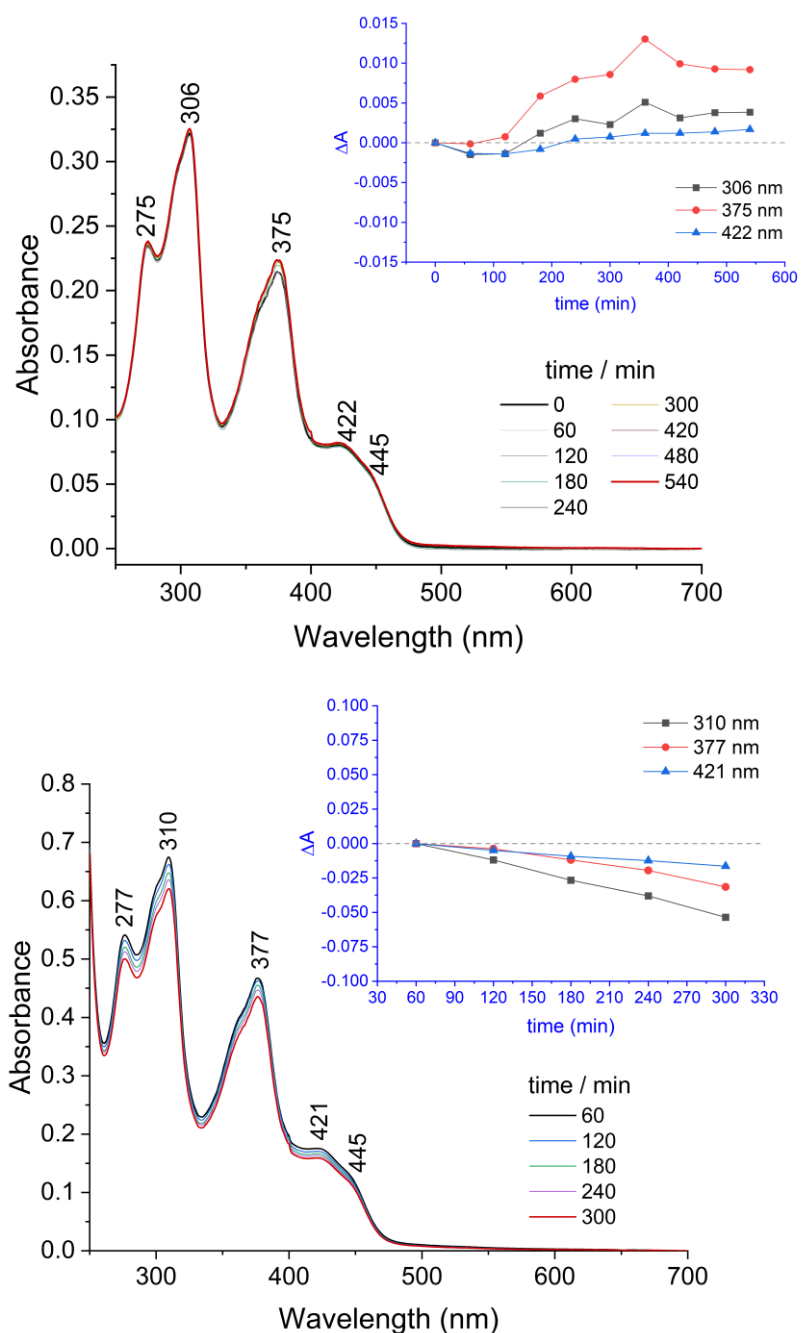

**Fig. S22** UV-vis spectra of 20- $\mu$ M solutions of **1** (top) and **2** (bottom) recorded as a function of time in  $\text{KH}_2\text{PO}_4$  buffer (50 mM pH 7.5). The solution of Pt(II) complex **1** had DMSO < 1% (V/V), while the solution of **2** had a final DMSO content of 20% (V/V). As shown by the inset plot for the spectra of **1**, the absorption maxima change negligibly with time. There are also no isosbestic points in the spectra. The data indicate that the complex undergoes no chemical reactions over the time interval investigated, with instrumental drift and slight solution evaporation accounting for the subtle absorbance changes. For complex **2**, the slightly more pronounced monotonic decrease in band intensity with time, without accompanying isosbestic points or band broadening, suggests gradual, partial precipitation of the compound. This observation reflects the more nonpolar structure of **2** compared with **1**. (Precipitation was even more prevalent for **3**; Fig. S23.)

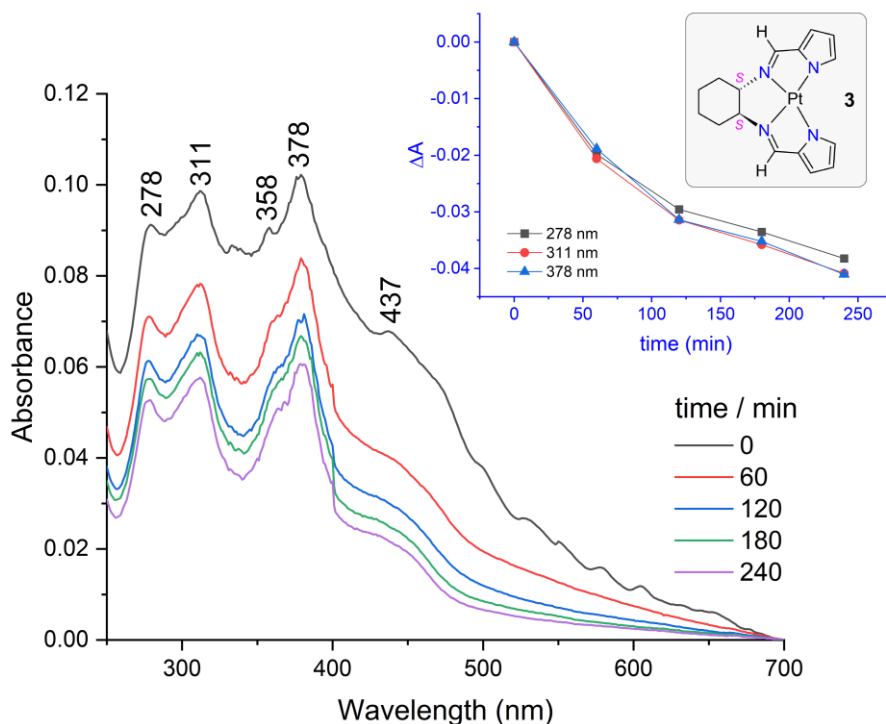

**Fig. S23** UV-vis spectra of a 20 μM solution of **3** recorded as a function of time in KH<sub>2</sub>PO<sub>4</sub> buffer (50 mM pH 7.5, 20% DMSO (V/V)). The poor solubility of the complex is evident from the low intensity of the spectra, their higher noise relative to spectra of **1** and **2** at the same concentration, and the monotonic decrease in intensity with time over the full wavelength range. The kinetic data reflect precipitation of the complex, which is earmarked by the lack of isosbestic points accompanying the spectral changes. The initial spectrum at  $t = 0$  min is especially broad and shows multiple band maxima, suggesting that the complex is significantly aggregated despite the DMSO content being 20% (V/V). Importantly, the spectral band maxima at  $t \geq 60$  min only change in intensity and do not undergo wavelength shifts. This indicates that no chemical reaction is occurring, such as complex hydrolysis or demetallation. From our TD-DFT assignments of the band maxima, loss of the Pt(II) ion from the chelate would eliminate the peak at 311 nm in the spectrum because this is an almost pure (97%) metal-to-ligand (MLCT) transition (Pt  $5d_{z^2} \rightarrow p^*, \pi^*$ ). Moreover, all bands  $> 350$  nm may be ascribed to transitions involving ligand molecular orbitals (MOs) that are heavily mixed with Pt  $5d_{xz}$  and  $5d_{yz}$  atomic orbitals; demetallation would thus significantly affect the electronic spectra of **1–3** in this region of the spectrum. Finally, at no point does the spectrum of the free ligand begin to appear in the spectra. The Pt(II) chelates studied here are thus chemically stable under the conditions employed for the protein binding experiments, which leads to the uptake of fully intact metal complexes.

### 7.1.8. Solvent effects for TD-DFT calculated UV-vis spectra

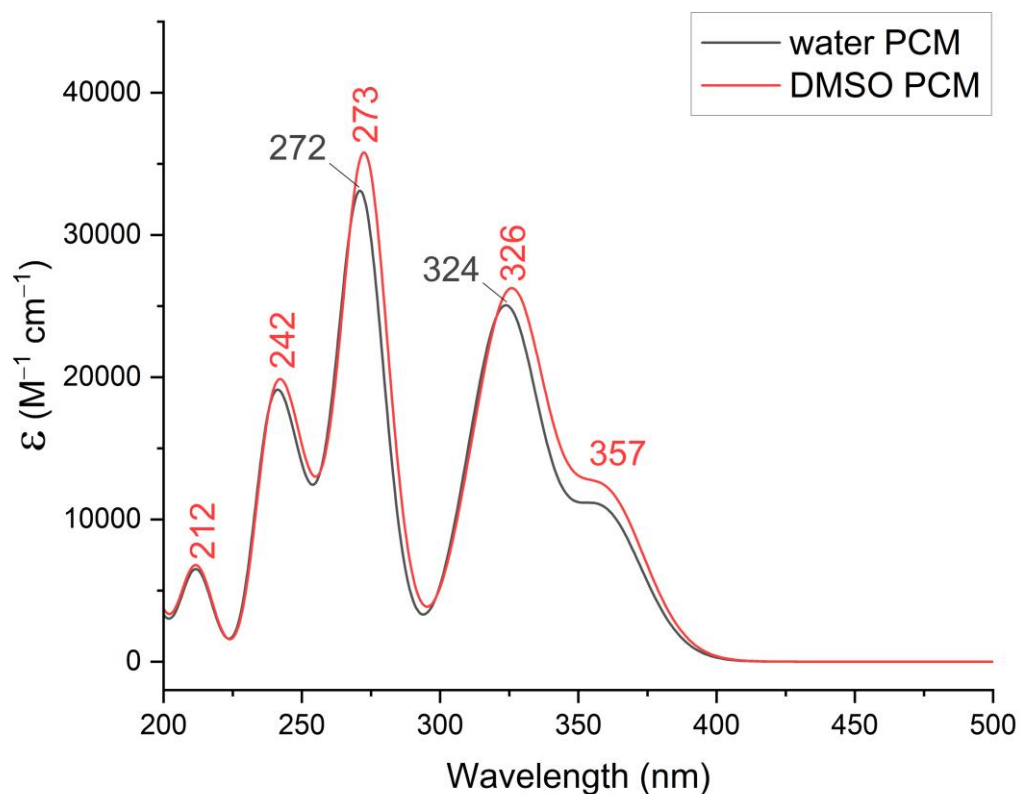

**Fig. S24** Electronic spectra of **1** calculated by the TD-DFT method (CAM-B3LYP/def2-QZVP/GD3BJ level of theory) in water and DMSO (PCM solvent continua). The spectra are similar for the two solvent systems with band maxima differing by at most 2 nm for bands > 300 nm. The overall shape and intensity profile of the bands is similar with longer-wavelength bands exhibiting a somewhat higher intensity in DMSO (8% at 273 nm). The band width for calculation of the spectral envelope in each case was 2500 Hz (fwhm).

## 8. Tables

**Table S1.** Crystal data and X-ray structure refinement details for Pt(II) bis(pyrrolide-imine) chelates **1** and **2**.

| Empirical formula                                            | C <sub>13</sub> H <sub>14</sub> N <sub>4</sub> OPt ( <b>1</b> )                     | C <sub>15</sub> H <sub>18</sub> N <sub>4</sub> Pt ( <b>2</b> )                       |
|--------------------------------------------------------------|-------------------------------------------------------------------------------------|--------------------------------------------------------------------------------------|
| CCDC deposit number                                          | <b>2271559</b>                                                                      | <b>2271558</b>                                                                       |
| Formula weight                                               | 437.37                                                                              | 449.42                                                                               |
| Temperature/K                                                | 173(2)                                                                              | 173(2)                                                                               |
| Crystal system                                               | triclinic                                                                           | triclinic                                                                            |
| Space group                                                  | <i>P</i> -1                                                                         | <i>P</i> -1                                                                          |
| <i>a</i> /Å                                                  | 9.0752(19)                                                                          | 13.7803(5)                                                                           |
| <i>b</i> /Å                                                  | 12.639(3)                                                                           | 15.2877(5)                                                                           |
| <i>c</i> /Å                                                  | 18.870(3)                                                                           | 16.8165(6)                                                                           |
| $\alpha$ /°                                                  | 108.653(7)                                                                          | 103.788(2)                                                                           |
| $\beta$ /°                                                   | 90.856(8)                                                                           | 104.926(2)                                                                           |
| $\gamma$ /°                                                  | 96.322(9)                                                                           | 107.795(2)                                                                           |
| Volume/Å <sup>3</sup>                                        | 2035.3(7)                                                                           | 3059.76(19)                                                                          |
| <i>Z</i>                                                     | 6                                                                                   | 8                                                                                    |
| $\rho_{\text{calc}}$ g/cm <sup>3</sup>                       | 2.141                                                                               | 1.951                                                                                |
| $\mu$ /mm <sup>-1</sup>                                      | 10.338                                                                              | 9.167                                                                                |
| <i>F</i> (000)                                               | 1236.0                                                                              | 1712.0                                                                               |
| Crystal size/mm <sup>3</sup>                                 | 0.180 × 0.050 × 0.050                                                               | 0.227 × 0.161 × 0.076                                                                |
| Radiation                                                    | MoK $\alpha$ ( $\lambda$ = 0.71073 Å)                                               | MoK $\alpha$ ( $\lambda$ = 0.71073 Å)                                                |
| Index ranges                                                 | -13 ≤ <i>h</i> ≤ 13, -19 ≤ <i>k</i> ≤ 19, -29 ≤ <i>l</i> ≤ 29                       | -19 ≤ <i>h</i> ≤ 19, -21 ≤ <i>k</i> ≤ 21, -24 ≤ <i>l</i> ≤ 24                        |
| Reflections collected                                        | 139345                                                                              | 113600                                                                               |
| Independent reflections                                      | 15567 [ <i>R</i> <sub>int</sub> = 0.0636, <i>R</i> <sub>sigma</sub> = 0.0358]       | 18723 [ <i>R</i> <sub>int</sub> = 0.0665, <i>R</i> <sub>sigma</sub> = 0.0536]        |
| Data/restraints/parameters                                   | 15567/0/514                                                                         | 18723/0/729                                                                          |
| Goodness-of-fit on <i>F</i> <sup>2</sup>                     | 1.050                                                                               | 1.004                                                                                |
| Final <i>R</i> indexes [ <i>I</i> ≥ 2 $\sigma$ ( <i>I</i> )] | <i>R</i> <sub>1</sub> = 0.0308, <i>wR</i> <sub>2</sub> = 0.0643                     | <i>R</i> <sub>1</sub> = 0.0327, <i>wR</i> <sub>2</sub> = 0.0527                      |
| Final <i>R</i> indexes [all data]                            | <i>R</i> <sub>1</sub> = 0.0444, <i>wR</i> <sub>2</sub> = 0.0689                     | <i>R</i> <sub>1</sub> = 0.0586, <i>wR</i> <sub>2</sub> = 0.0590                      |
| Largest diff. peak/hole / e Å <sup>-3</sup>                  | 1.90/-1.46                                                                          | 0.96/-1.10                                                                           |
| Disordered solvent mask                                      | 1 void/cell, 98 electrons, <i>V</i> = 172 Å <sup>3</sup> , 1.5 H <sub>2</sub> O/ASU | 3 voids/cell, 27 electrons, <i>V</i> = 229 Å <sup>3</sup> , 1.2 H <sub>2</sub> O/ASU |



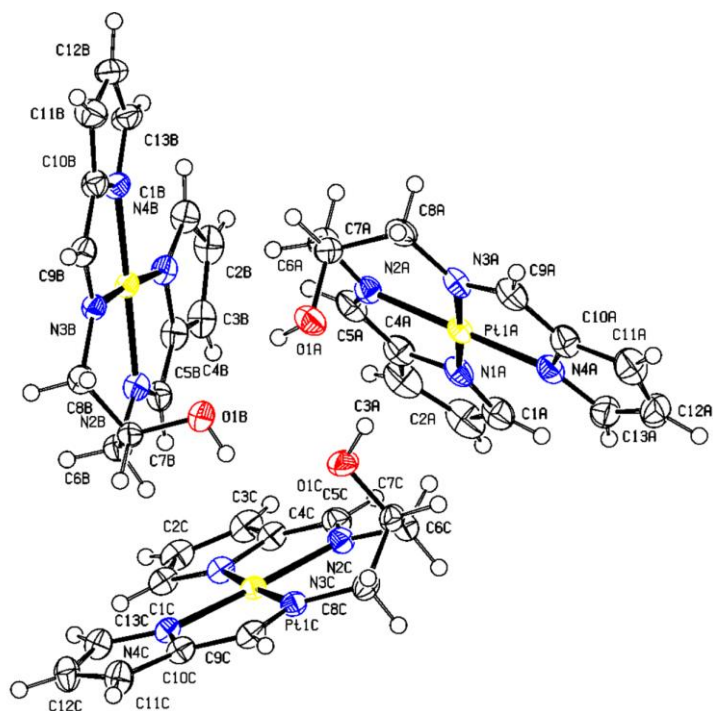

**Table S2.** Selected geometrical parameters (Å, °) for the X-ray structure of **1** and **2**. A labelled thermal ellipsoid plot (50% probability surfaces) is included above to aid in reading the tabulated data.

| Atom     | Length/Å | Atom      | Length/Å |
|----------|----------|-----------|----------|
| Pt1C N3C | 2.009(3) | N2A C5A   | 1.290(5) |
| Pt1C N2C | 2.009(3) | N2A C6A   | 1.452(6) |
| Pt1C N4C | 2.012(3) | N1B C1B   | 1.354(5) |
| Pt1C N1C | 2.017(3) | N1B C4B   | 1.386(5) |
| Pt1B N2B | 2.003(3) | C5A C4A   | 1.420(7) |
| Pt1B N3B | 2.004(3) | C9C C10C  | 1.423(6) |
| Pt1B N4B | 2.011(3) | C3A C2A   | 1.384(8) |
| Pt1B N1B | 2.017(3) | C3A C4A   | 1.409(6) |
| Pt1A N2A | 2.000(3) | C4C C3C   | 1.389(6) |
| Pt1A N1A | 2.008(4) | C4C C5C   | 1.420(6) |
| Pt1A N3A | 2.009(3) | C2B C3B   | 1.399(7) |
| Pt1A N4A | 2.014(4) | C2B C1B   | 1.407(6) |
| O1B C7B  | 1.413(5) | C9A C10A  | 1.425(7) |
| O1C C7C  | 1.410(5) | C10C C11C | 1.395(6) |
| N3A C9A  | 1.292(6) | C9B C10B  | 1.419(6) |
| N3A C8A  | 1.464(6) | C8B C7B   | 1.518(6) |
| O1A C7A  | 1.428(5) | C4B C3B   | 1.397(6) |
| N1C C1C  | 1.356(5) | C4B C5B   | 1.423(6) |
| N1C C4C  | 1.388(5) | C7B C6B   | 1.523(6) |
| N2C C5C  | 1.304(5) | C3C C2C   | 1.405(7) |
| N2C C6C  | 1.465(5) | C2C C1C   | 1.392(6) |
| N4C C13C | 1.345(5) | C2A C1A   | 1.386(7) |
| N4C C10C | 1.386(5) | C10A C11A | 1.398(7) |
| N3C C9C  | 1.294(5) | C8A C7A   | 1.525(6) |

|     |      |          |      |      |          |
|-----|------|----------|------|------|----------|
| N3C | C8C  | 1.456(5) | C8C  | C7C  | 1.523(6) |
| N4A | C13A | 1.345(6) | C12B | C11B | 1.385(6) |
| N4A | C10A | 1.373(6) | C12B | C13B | 1.404(7) |
| N4B | C13B | 1.352(5) | C10B | C11B | 1.397(6) |
| N4B | C10B | 1.382(5) | C11A | C12A | 1.387(8) |
| N3B | C9B  | 1.306(5) | C11C | C12C | 1.393(6) |
| N3B | C8B  | 1.467(5) | C7C  | C6C  | 1.521(6) |
| N2B | C5B  | 1.304(5) | C12C | C13C | 1.392(6) |
| N2B | C6B  | 1.460(5) | C12A | C13A | 1.404(7) |
| N1A | C1A  | 1.358(6) | C6A  | C7A  | 1.517(6) |
| N1A | C4A  | 1.393(6) |      |      |          |

| Atom |      |      | Angle/°    | Atom |      |      | Angle/°  |
|------|------|------|------------|------|------|------|----------|
| N3C  | Pt1C | N2C  | 95.58(14)  | C2A  | C3A  | C4A  | 105.9(4) |
| N3C  | Pt1C | N4C  | 80.47(13)  | N1C  | C4C  | C3C  | 109.9(4) |
| N2C  | Pt1C | N4C  | 174.81(13) | N1C  | C4C  | C5C  | 114.7(3) |
| N3C  | Pt1C | N1C  | 175.57(13) | C3C  | C4C  | C5C  | 135.5(4) |
| N2C  | Pt1C | N1C  | 80.13(14)  | C3B  | C2B  | C1B  | 107.0(4) |
| N4C  | Pt1C | N1C  | 103.88(13) | N2C  | C5C  | C4C  | 116.9(4) |
| N2B  | Pt1B | N3B  | 95.66(13)  | N3A  | C9A  | C10A | 117.6(4) |
| N2B  | Pt1B | N4B  | 175.79(13) | N4C  | C10C | C11C | 109.6(4) |
| N3B  | Pt1B | N4B  | 80.19(13)  | N4C  | C10C | C9C  | 114.8(3) |
| N2B  | Pt1B | N1B  | 80.38(14)  | C11C | C10C | C9C  | 135.5(4) |
| N3B  | Pt1B | N1B  | 175.65(13) | N3B  | C9B  | C10B | 116.5(4) |
| N4B  | Pt1B | N1B  | 103.74(14) | N3B  | C8B  | C7B  | 113.3(3) |
| N2A  | Pt1A | N1A  | 80.27(15)  | N1B  | C4B  | C3B  | 109.1(4) |
| N2A  | Pt1A | N3A  | 95.70(15)  | N1B  | C4B  | C5B  | 114.8(4) |
| N1A  | Pt1A | N3A  | 175.50(15) | C3B  | C4B  | C5B  | 136.0(4) |
| N2A  | Pt1A | N4A  | 175.66(14) | O1B  | C7B  | C8B  | 108.6(3) |
| N1A  | Pt1A | N4A  | 103.89(16) | O1B  | C7B  | C6B  | 113.2(3) |
| N3A  | Pt1A | N4A  | 80.19(15)  | C8B  | C7B  | C6B  | 114.5(3) |
| C9A  | N3A  | C8A  | 121.3(4)   | N2B  | C5B  | C4B  | 116.8(4) |
| C9A  | N3A  | Pt1A | 114.7(3)   | C4C  | C3C  | C2C  | 105.7(4) |
| C8A  | N3A  | Pt1A | 123.8(3)   | C1C  | C2C  | C3C  | 107.9(4) |
| C1C  | N1C  | C4C  | 107.2(3)   | C3A  | C2A  | C1A  | 108.0(4) |
| C1C  | N1C  | Pt1C | 139.8(3)   | C4B  | C3B  | C2B  | 106.7(4) |
| C4C  | N1C  | Pt1C | 113.0(3)   | N4A  | C10A | C11A | 110.7(4) |
| C5C  | N2C  | C6C  | 120.8(3)   | N4A  | C10A | C9A  | 114.3(4) |

|      |     |      |          |           |      |          |
|------|-----|------|----------|-----------|------|----------|
| C5C  | N2C | Pt1C | 115.4(3) | C11A C10A | C9A  | 135.0(5) |
| C6C  | N2C | Pt1C | 123.8(3) | N1A C4A   | C3A  | 109.5(4) |
| C13C | N4C | C10C | 106.9(3) | N1A C4A   | C5A  | 114.4(4) |
| C13C | N4C | Pt1C | 140.5(3) | C3A C4A   | C5A  | 136.2(5) |
| C10C | N4C | Pt1C | 112.5(3) | N3A C8A   | C7A  | 113.1(3) |
| C9C  | N3C | C8C  | 121.2(3) | N1C C1C   | C2C  | 109.3(4) |
| C9C  | N3C | Pt1C | 115.0(3) | N3C C8C   | C7C  | 112.1(3) |
| C8C  | N3C | Pt1C | 123.9(3) | C11B C12B | C13B | 107.3(4) |
| C13A | N4A | C10A | 107.4(4) | N4B C10B  | C11B | 109.4(4) |
| C13A | N4A | Pt1A | 139.4(3) | N4B C10B  | C9B  | 114.9(4) |
| C10A | N4A | Pt1A | 113.0(3) | C11B C10B | C9B  | 135.7(4) |
| C13B | N4B | C10B | 107.3(3) | C12B C11B | C10B | 106.6(4) |
| C13B | N4B | Pt1B | 139.7(3) | N1A C1A   | C2A  | 110.3(5) |
| C10B | N4B | Pt1B | 113.0(3) | C12A C11A | C10A | 104.5(5) |
| C9B  | N3B | C8B  | 120.9(3) | C12C C11C | C10C | 106.0(4) |
| C9B  | N3B | Pt1B | 115.4(3) | O1C C7C   | C6C  | 112.7(3) |
| C8B  | N3B | Pt1B | 123.8(3) | O1C C7C   | C8C  | 107.9(3) |
| C5B  | N2B | C6B  | 120.4(4) | C6C C7C   | C8C  | 114.0(3) |
| C5B  | N2B | Pt1B | 115.3(3) | N2B C6B   | C7B  | 113.0(3) |
| C6B  | N2B | Pt1B | 124.3(3) | N2C C6C   | C7C  | 113.6(3) |
| C1A  | N1A | C4A  | 106.2(4) | C13C C12C | C11C | 107.5(4) |
| C1A  | N1A | Pt1A | 141.0(3) | C11A C12A | C13A | 108.8(5) |
| C4A  | N1A | Pt1A | 112.7(3) | N1B C1B   | C2B  | 109.4(4) |
| C5A  | N2A | C6A  | 120.1(4) | N4C C13C  | C12C | 110.1(4) |
| C5A  | N2A | Pt1A | 115.6(3) | N4B C13B  | C12B | 109.5(4) |
| C6A  | N2A | Pt1A | 124.1(3) | N2A C6A   | C7A  | 115.2(4) |
| C1B  | N1B | C4B  | 107.7(3) | N4A C13A  | C12A | 108.6(5) |
| C1B  | N1B | Pt1B | 139.5(3) | O1A C7A   | C6A  | 112.9(4) |
| C4B  | N1B | Pt1B | 112.7(3) | O1A C7A   | C8A  | 107.2(4) |
| N2A  | C5A | C4A  | 117.0(4) | C6A C7A   | C8A  | 114.5(4) |
| N3C  | C9C | C10C | 117.2(3) |           |      |          |

---

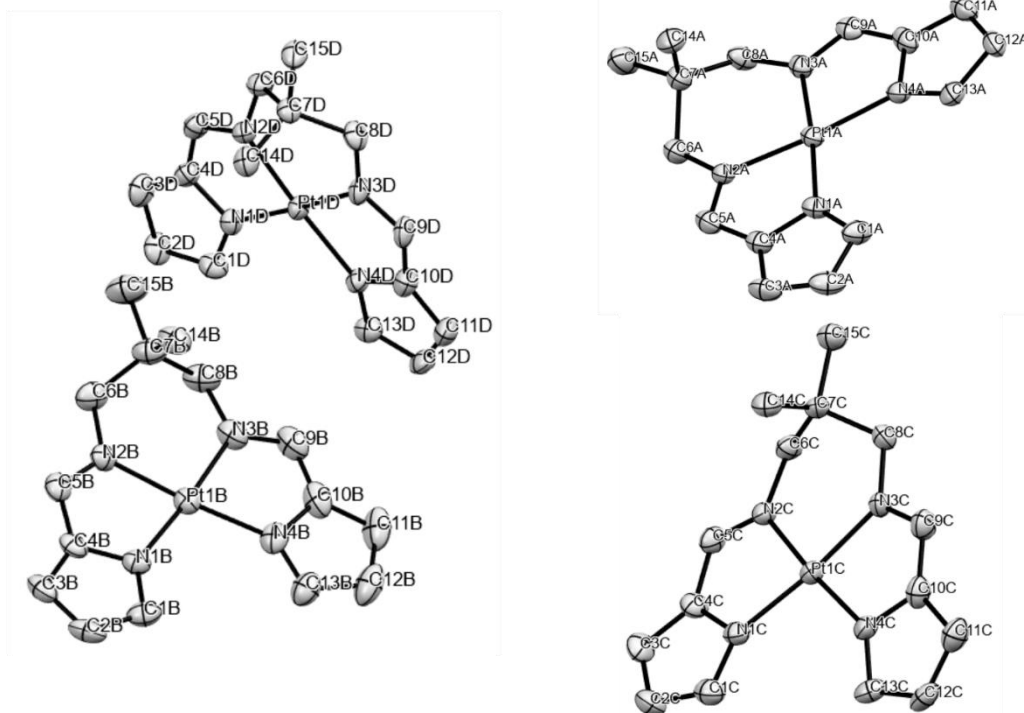

**Table S3.** Selected geometrical parameters (Å, °) for the X-ray structure of **1** and **2**. A labelled thermal ellipsoid plot (50% probability surfaces, H atoms omitted for clarity) is included above to aid in reading the tabulated data.

| Atom     | Length/Å | Atom     | Length/Å |
|----------|----------|----------|----------|
| Pt1A N1A | 2.016(3) | Pt1C N1C | 2.013(3) |
| Pt1A N2A | 2.005(3) | Pt1C N2C | 2.003(3) |
| Pt1A N3A | 2.003(3) | Pt1C N3C | 2.001(3) |
| Pt1A N4A | 2.010(3) | Pt1C N4C | 2.015(3) |
| N1A C1A  | 1.344(5) | N1C C1C  | 1.344(5) |
| N1A C4A  | 1.377(5) | N1C C4C  | 1.375(5) |
| N2A C5A  | 1.304(5) | N2C C5C  | 1.293(5) |
| N2A C6A  | 1.467(5) | N2C C6C  | 1.460(5) |
| N3A C8A  | 1.466(5) | N3C C8C  | 1.470(5) |
| N3A C9A  | 1.298(5) | N3C C9C  | 1.300(5) |
| N4A C10A | 1.383(5) | N4C C10C | 1.387(5) |
| N4A C13A | 1.343(5) | N4C C13C | 1.352(5) |
| C1A C2A  | 1.390(6) | C1C C2C  | 1.390(6) |
| C2A C3A  | 1.388(6) | C2C C3C  | 1.391(6) |
| C3A C4A  | 1.396(5) | C3C C4C  | 1.380(6) |
| C4A C5A  | 1.435(6) | C4C C5C  | 1.421(6) |
| C6A C7A  | 1.536(5) | C6C C7C  | 1.539(5) |
| C7A C8A  | 1.531(6) | C7C C8C  | 1.535(5) |
| C7A C14A | 1.528(6) | C7C C14C | 1.516(6) |
| C7A C15A | 1.534(6) | C7C C15C | 1.535(5) |

| Atom      | Length/Å | Atom      | Length/Å |          |
|-----------|----------|-----------|----------|----------|
| C9A C10A  | 1.416(6) | C9C C10C  | 1.417(6) |          |
| C10A C11A | 1.384(6) | C10C C11C | 1.398(6) |          |
| C11A C12A | 1.398(6) | C11C C12C | 1.381(6) |          |
| C12A C13A | 1.389(6) | C12C C13C | 1.387(6) |          |
| Pt1B N1B  | 2.013(3) | Pt1D N1D  | 2.010(3) |          |
| Pt1B N2B  | 2.000(3) | Pt1D N2D  | 2.000(3) |          |
| Pt1B N3B  | 1.996(4) | Pt1D N3D  | 2.009(3) |          |
| Pt1B N4B  | 2.012(4) | Pt1D N4D  | 2.012(3) |          |
| N1B C1B   | 1.340(5) | N1D C1D   | 1.336(5) |          |
| N1B C4B   | 1.383(5) | N1D C4D   | 1.375(5) |          |
| N2B C5B   | 1.295(5) | N2D C5D   | 1.304(5) |          |
| N2B C6B   | 1.470(5) | N2D C6D   | 1.460(5) |          |
| N3B C8B   | 1.467(6) | N3D C8D   | 1.467(5) |          |
| N3B C9B   | 1.296(6) | N3D C9D   | 1.291(5) |          |
| N4B C10B  | 1.388(6) | N4D C10D  | 1.385(5) |          |
| N4B C13B  | 1.351(6) | N4D C13D  | 1.354(5) |          |
| C1B C2B   | 1.388(6) | C1D C2D   | 1.391(6) |          |
| C2B C3B   | 1.369(6) | C2D C3D   | 1.391(6) |          |
| C3B C4B   | 1.398(6) | C3D C4D   | 1.389(6) |          |
| C4B C5B   | 1.421(6) | C4D C5D   | 1.414(6) |          |
| C6B C7B   | 1.545(6) | C6D C7D   | 1.544(5) |          |
| C7B C8B   | 1.539(6) | C7D C8D   | 1.534(5) |          |
| C7B C14B  | 1.522(6) | C7D C14D  | 1.523(5) |          |
| C7B C15B  | 1.526(6) | C7D C15D  |          | 1.528(5) |
| C9B C10B  | 1.411(7) | C9D C10D  |          | 1.421(6) |
| C10B C11B | 1.402(7) | C10D C11D |          | 1.382(6) |
| C11B C12B | 1.378(7) | C11D C12D |          | 1.385(6) |
| C12B C13B | 1.394(6) | C12D C13D |          | 1.392(6) |

| Atom Atom Atom | Angle/°    | Atom Atom Atom | Angle/°    |
|----------------|------------|----------------|------------|
| N2A Pt1A N1A   | 80.20(13)  | N1C Pt1C N4C   | 104.34(13) |
| N2A Pt1A N4A   | 175.22(13) | N2C Pt1C N1C   | 79.76(13)  |
| N3A Pt1A N1A   | 175.41(14) | N2C Pt1C N4C   | 175.67(13) |
| N3A Pt1A N2A   | 95.63(13)  | N3C Pt1C N1C   | 174.26(13) |
| N3A Pt1A N4A   | 79.95(13)  | N3C Pt1C N2C   | 95.77(13)  |
| N4A Pt1A N1A   | 104.15(13) | N3C Pt1C N4C   | 80.22(13)  |
| C1A N1A Pt1A   | 140.1(3)   | C1C N1C Pt1C   | 138.8(3)   |
| C1A N1A C4A    | 107.0(3)   | C1C N1C C4C    | 107.1(4)   |
| C4A N1A Pt1A   | 112.9(3)   | C4C N1C Pt1C   | 113.5(3)   |
| C5A N2A Pt1A   | 115.9(3)   | C5C N2C Pt1C   | 115.4(3)   |
| C5A N2A C6A    | 120.6(3)   | C5C N2C C6C    | 122.3(3)   |
| C6A N2A Pt1A   | 123.5(2)   | C6C N2C Pt1C   | 122.1(2)   |

| Atom | Atom | Atom | Angle/°    | Atom | Atom | Atom | Angle/°    |
|------|------|------|------------|------|------|------|------------|
| C8A  | N3A  | Pt1A | 123.8(2)   | C8C  | N3C  | Pt1C | 124.1(2)   |
| C9A  | N3A  | Pt1A | 115.4(3)   | C9C  | N3C  | Pt1C | 115.5(3)   |
| C9A  | N3A  | C8A  | 120.9(3)   | C9C  | N3C  | C8C  | 120.3(3)   |
| C10A | N4A  | Pt1A | 113.3(3)   | C10C | N4C  | Pt1C | 112.6(3)   |
| C13A | N4A  | Pt1A | 140.3(3)   | C13C | N4C  | Pt1C | 140.1(3)   |
| C13A | N4A  | C10A | 106.2(3)   | C13C | N4C  | C10C | 107.1(3)   |
| N1A  | C1A  | C2A  | 110.0(4)   | N1C  | C1C  | C2C  | 109.8(4)   |
| C3A  | C2A  | C1A  | 107.4(4)   | C1C  | C2C  | C3C  | 107.0(4)   |
| C2A  | C3A  | C4A  | 105.9(4)   | C4C  | C3C  | C2C  | 106.5(4)   |
| N1A  | C4A  | C3A  | 109.6(4)   | N1C  | C4C  | C3C  | 109.7(4)   |
| N1A  | C4A  | C5A  | 115.2(3)   | N1C  | C4C  | C5C  | 114.0(4)   |
| C3A  | C4A  | C5A  | 135.1(4)   | C3C  | C4C  | C5C  | 136.1(4)   |
| N2A  | C5A  | C4A  | 115.8(4)   | N2C  | C5C  | C4C  | 117.2(4)   |
| N2A  | C6A  | C7A  | 113.6(3)   | N2C  | C6C  | C7C  | 113.7(3)   |
| C8A  | C7A  | C6A  | 111.6(3)   | C8C  | C7C  | C6C  | 110.2(3)   |
| C8A  | C7A  | C15A | 106.3(4)   | C14C | C7C  | C6C  | 111.1(3)   |
| C14A | C7A  | C6A  | 110.6(4)   | C14C | C7C  | C8C  | 112.2(3)   |
| C14A | C7A  | C8A  | 110.9(3)   | C14C | C7C  | C15C | 109.8(3)   |
| C14A | C7A  | C15A | 109.8(4)   | C15C | C7C  | C6C  | 106.9(3)   |
| C15A | C7A  | C6A  | 107.3(3)   | C15C | C7C  | C8C  | 106.4(3)   |
| N3A  | C8A  | C7A  | 114.5(3)   | N3C  | C8C  | C7C  | 114.5(3)   |
| N3A  | C9A  | C10A | 117.2(4)   | N3C  | C9C  | C10C | 116.8(4)   |
| N4A  | C10A | C9A  | 114.2(4)   | N4C  | C10C | C9C  | 114.8(4)   |
| N4A  | C10A | C11A | 110.3(4)   | N4C  | C10C | C11C | 108.6(4)   |
| C11A | C10A | C9A  | 135.3(4)   | C11C | C10C | C9C  | 136.5(4)   |
| C10A | C11A | C12A | 106.0(4)   | C12C | C11C | C10C | 107.0(4)   |
| C13A | C12A | C11A | 106.8(4)   | C11C | C12C | C13C | 107.3(4)   |
| N4A  | C13A | C12A | 110.8(4)   | N4C  | C13C | C12C | 110.0(4)   |
| N2B  | Pt1B | N1B  | 79.94(14)  | N1D  | Pt1D | N4D  | 104.20(13) |
| N2B  | Pt1B | N4B  | 175.53(15) | N2D  | Pt1D | N1D  | 79.77(13)  |
| N3B  | Pt1B | N1B  | 175.29(15) | N2D  | Pt1D | N3D  | 96.06(13)  |
| N3B  | Pt1B | N2B  | 95.89(15)  | N2D  | Pt1D | N4D  | 175.94(13) |
| N3B  | Pt1B | N4B  | 79.84(16)  | N3D  | Pt1D | N1D  | 174.79(12) |
| N4B  | Pt1B | N1B  | 104.27(15) | N3D  | Pt1D | N4D  | 80.03(13)  |
| C1B  | N1B  | Pt1B | 140.4(3)   | C1D  | N1D  | Pt1D | 139.2(3)   |
| C1B  | N1B  | C4B  | 106.5(4)   | C1D  | N1D  | C4D  | 107.2(3)   |
| C4B  | N1B  | Pt1B | 113.0(3)   | C4D  | N1D  | Pt1D | 113.3(3)   |
| C5B  | N2B  | Pt1B | 115.8(3)   | C5D  | N2D  | Pt1D | 115.7(3)   |
| C5B  | N2B  | C6B  | 120.4(4)   | C5D  | N2D  | C6D  | 121.8(3)   |
| C6B  | N2B  | Pt1B | 123.8(3)   | C6D  | N2D  | Pt1D | 122.3(2)   |
| C8B  | N3B  | Pt1B | 123.3(3)   | C8D  | N3D  | Pt1D | 123.7(2)   |
| C9B  | N3B  | Pt1B | 116.2(3)   | C9D  | N3D  | Pt1D | 115.4(3)   |
| C9B  | N3B  | C8B  | 120.5(4)   | C9D  | N3D  | C8D  | 120.9(3)   |
| C10B | N4B  | Pt1B | 112.7(3)   | C10D | N4D  | Pt1D | 113.0(3)   |
| C13B | N4B  | Pt1B | 139.9(3)   | C13D | N4D  | Pt1D | 140.1(3)   |

| Atom Atom Atom | Angle/°  | Atom Atom Atom | Angle/°  |
|----------------|----------|----------------|----------|
| C13B N4B C10B  | 107.4(4) | C13D N4D C10D  | 106.8(3) |
| N1B C1B C2B    | 110.3(4) | N1D C1D C2D    | 110.9(4) |
| C3B C2B C1B    | 107.6(4) | C3D C2D C1D    | 105.8(4) |
| C2B C3B C4B    | 106.3(4) | C4D C3D C2D    | 107.3(4) |
| N1B C4B C3B    | 109.2(4) | N1D C4D C3D    | 108.8(4) |
| N1B C4B C5B    | 114.5(4) | N1D C4D C5D    | 114.8(4) |
| C3B C4B C5B    | 135.8(4) | C3D C4D C5D    | 136.2(4) |
| N2B C5B C4B    | 116.6(4) | N2D C5D C4D    | 116.3(4) |
| N2B C6B C7B    | 114.5(4) | N2D C6D C7D    | 114.4(3) |
| C8B C7B C6B    | 110.5(4) | C8D C7D C6D    | 110.6(3) |
| C14B C7B C6B   | 111.3(4) | C14D C7D C6D   | 110.6(3) |
| C14B C7B C8B   | 110.6(4) | C14D C7D C8D   | 111.3(3) |
| C14B C7B C15B  | 110.1(4) | C14D C7D C15D  | 110.9(3) |
| C15B C7B C6B   | 106.6(4) | C15D C7D C6D   | 106.0(3) |
| C15B C7B C8B   | 107.6(4) | C15D C7D C8D   | 107.2(3) |
| N3B C8B C7B    | 114.0(4) | N3D C8D C7D    | 114.9(3) |
| N3B C9B C10B   | 116.3(4) | N3D C9D C10D   | 117.1(4) |
| N4B C10B C9B   | 114.9(4) | N4D C10D C9D   | 114.5(4) |
| N4B C10B C11B  | 108.5(5) | C11D C10D N4D  | 109.1(4) |
| C11B C10B C9B  | 136.5(5) | C11D C10D C9D  | 136.4(4) |
| C12B C11B C10B | 106.9(5) | C10D C11D C12D | 107.5(4) |
| C11B C12B C13B | 107.6(5) | C11D C12D C13D | 106.6(4) |
| N4B C13B C12B  | 109.6(5) | N4D C13D C12D  | 110.1(4) |

**Table S4.** Selected mean crystallographic and calculated structural and conformational parameters for compounds **1** and **2**.

|                                                   | <b>1</b>    |            | <b>2</b>    |            |
|---------------------------------------------------|-------------|------------|-------------|------------|
|                                                   | <b>XRD</b>  | <b>DFT</b> | <b>XRD</b>  | <b>DFT</b> |
| <b>Bond distances (Å)</b>                         |             |            |             |            |
| Pt-N <sub>pyrrole</sub>                           | 2.011 (3)   | 2.026      | 2.013 (3)   | 2.026      |
| Pt-N <sub>imine</sub>                             | 2.005 (3)   | 2.02       | 2.002 (3)   | 2.019      |
| C=N                                               | 1.30 (5)    | 1.29       | 1.298 (5)   | 1.29       |
| <b>Bond angles (°)</b>                            |             |            |             |            |
| N <sub>pyrrole</sub> -Pt-N <sub>pyrrole</sub>     | 103.82 (14) | 104.9      | 104.25 (14) | 105.12     |
| N <sub>imine</sub> -Pt-N <sub>imine</sub>         | 95.65 (14)  | 95.87      | 95.75 (14)  | 95.45      |
| cis-N <sub>pyrrole</sub> -Pt-N <sub>imine</sub>   | 80.27 (14)  | 79.58      | 79.96 (13)  | 79.,66     |
| trans-N <sub>pyrrole</sub> -Pt-N <sub>imine</sub> | 175.50 (13) | 175.04     | 175.27 (14) | 174.54     |
| C-N <sub>pyrrole</sub> -C                         | 107.05 (3)  | 107.48     | 106.91 (3)  | 107.5      |
| C-N <sub>imine</sub> -C                           | 120.78 (3)  | 121.31     | 120.96 (4)  | 121.59     |



**Table S5.** Selected excited singlet states of TD-DFT calculations for complex **1** (CAM-B3LYP/DEF2-QZVP/GD3BJ in an acetonitrile solvent continuum).

| Excited states | Energy/<br>eV | Wavelength<br>(nm) | Oscillator<br>strength |           | Major contributions<br>(%)                                                                |
|----------------|---------------|--------------------|------------------------|-----------|-------------------------------------------------------------------------------------------|
| 1              | 3.4631        | 358                | 0.1163                 | Singlet-A | HOMO->LUMO (86%),<br>H-3->LUMO (4%),<br>H-2->L+1 (4%)                                     |
| 2              | 3.8112        | 324                | 0.2345                 | Singlet-A | H-1->LUMO (75%),<br>HOMO->L+1 (19%)                                                       |
| 3              | 3.9897        | 310                | 0.1042                 | Singlet-A | H-2->LUMO (53%),<br>H-1->LUMO (12%),<br>HOMO->L+1 (28%)<br>H-3->L+1 (4%)                  |
| 4              | 4.3064        | 287                | 0.0113                 | Singlet-A | H-4->LUMO (97%)<br>H-3->LUMO (2%)                                                         |
| 5              | 4.527         | 273                | 0.0005                 | Singlet-A | H-5->L+2 (12%),<br>H-3->L+2 (13%),<br>HOMO->L+2 (61%)                                     |
| 6              | 4.5794        | 270                | 0.3445                 | Singlet-A | H-3->LUMO (31%),<br>H-1->L+1 (56%)<br>H-2->L+1 (8%)                                       |
| 7              | 4.6797        | 264                | 0.0122                 | Singlet-A | H-4->L+2 (60%),<br>H-2->LUMO (16%)<br>H-3->L+1 (2%),<br>H-1->LUMO (4%),<br>HOMO->L+1 (7%) |

**Table S6.** Selected excited singlet states of TD-DFT calculations for complex **2** (CAM-B3LYP/DEF2-QZVP/GD3BJ in an acetonitrile solvent continuum).

| Excited states | Energy/ eV ( $\lambda$ nm) | Wavelength (nm) | Oscillator strength |           | Major contributions (%)                                                  |
|----------------|----------------------------|-----------------|---------------------|-----------|--------------------------------------------------------------------------|
| 1              | 3.48                       | 356             | 0.1249              | Singlet-A | HOMO->LUMO (86%),<br>H-3->LUMO (4%),<br>H-2->L+1 (4%),<br>H-1->L+1 (2%)  |
| 2              | 3.8327                     | 323             | 0.2375              | Singlet-A | H-1->LUMO (74%),<br>HOMO->L+1 (20%)                                      |
| 3              | 4.0071                     | 309             | 0.1061              | Singlet-A | H-2->LUMO (54%),<br>H-1->LUMO (13%),<br>HOMO->L+1 (26%)<br>H-3->L+1 (4%) |
| 4              | 4.3339                     | 286             | 0.0118              | Singlet-A | H-4->LUMO (94%)<br>H-3->LUMO (5%)                                        |
| 5              | 4.5513                     | 272             | 0.0001              | Singlet-A | H-5->L+2 (13%),<br>H-3->L+2 (14%),<br>HOMO->L+2 (64%)                    |
| 6              | 4.5935                     | 269             | 0.3738              | Singlet-A | H-3->LUMO (31%),<br>H-1->L+1 (56%)<br>H-4->LUMO (2%),<br>H-2->L+1 (8%)   |

**Table S7.** Summary of GLIDE XP docking scores and selected interaction energy parameters for HSA targets prepared from ligand-free and ligand-bound grids based on geometry-optimized (prepared) structures derived from PDB codes 1HA2 (HSA•{warfarin} complex), 2BXF (HSA•{diazepam} complex), and 2BXG (HSA•{ibuprofen}<sub>2</sub> complex). The docking runs were truncated to report only the top-scoring ligand pose for each ligand. All energies are in units of kcal mol<sup>-1</sup>.

| Ligand or drug                                                                               | Binding site location | ligand effic. | ligand effic. sa | glide ligand effic. In | XP GScore | glide Evdw | glide ECoul | glide energy | glide Einternal | glide Emodel | XP H Bond | XP Lipo. EvdW | XP EElectro |
|----------------------------------------------------------------------------------------------|-----------------------|---------------|------------------|------------------------|-----------|------------|-------------|--------------|-----------------|--------------|-----------|---------------|-------------|
| <b>1HA2 - No warfarin bound in subdomain IIA of protein docking grid (Sudlow's Site I)</b>   |                       |               |                  |                        |           |            |             |              |                 |              |           |               |             |
| ibuprofen                                                                                    | IA                    | -0.533        | -1.315           | -2.158                 | -8.001    | -22.998    | -1.285      | -24.283      | 3.939           | -31.178      | 0         | -4.64         | -0.096      |
| Warfarin                                                                                     | IIA                   | -0.327        | -0.929           | -1.817                 | -7.513    | -42.858    | -2.647      | -45.506      | 3.007           | -63.649      | -0.353    | -5.865        | -0.199      |
| Diazepam                                                                                     | IIA-IIB               | -0.251        | -0.681           | -1.256                 | -5.019    | -25.042    | -0.568      | -25.610      | 1.048           | -33.330      | 0         | -3.979        | -0.043      |
| 2                                                                                            | IA-IIA                | -0.242        | -0.657           | -1.212                 | -4.843    | -23.547    | -0.339      | -23.887      | 0.000           | -30.228      | 0.000     | -2.533        | -0.025      |
| 1                                                                                            | IA-IIA                | -0.243        | -0.648           | -1.171                 | -4.617    | -23.762    | -0.579      | -24.341      | 0.325           | -31.517      | 0.000     | -2.614        | -0.043      |
| <b>1HA2 - Warfarin bound in subdomain IIA of protein (Sudlow's Site I)</b>                   |                       |               |                  |                        |           |            |             |              |                 |              |           |               |             |
| Ibuprofen                                                                                    | IIIA                  | -0.590        | -1.455           | -2.387                 | -8.850    | -26.042    | -10.132     | -36.174      | 8.038           | -47.749      | -0.667    | -4.515        | -0.760      |
| Warfarin                                                                                     | IIIA                  | -0.365        | -1.039           | -2.032                 | -8.404    | -35.237    | -1.045      | -36.282      | 5.918           | -51.380      | -0.541    | -5.201        | -0.078      |
| Diazepam                                                                                     | IIIA                  | -0.295        | -0.800           | -1.476                 | -5.896    | -32.921    | 0.055       | -32.866      | 0.050           | -43.701      | -0.175    | -4.435        | 0.004       |
| 2                                                                                            | IIA                   | -0.244        | -0.662           | -1.221                 | -4.880    | -21.885    | -3.481      | -25.366      | 0.000           | -28.067      | -0.073    | -2.544        | -0.261      |
| 1                                                                                            | IIIA                  | -0.073        | -0.195           | -0.352                 | -1.390    | -21.763    | -2.510      | -24.273      | 0.000           | -34.975      | -0.326    | -2.596        | -0.188      |
| <b>2BXF - No diazepam bound in subdomain IIIA of protein docking grid (Sudlow's Site II)</b> |                       |               |                  |                        |           |            |             |              |                 |              |           |               |             |
| Diazepam                                                                                     | IIIA                  | -0.452        | -1.226           | -2.260                 | -9.032    | -44.241    | -2.966      | -47.207      | 1.236           | -67.088      | -0.688    | -6.504        | -0.222      |
| Warfarin                                                                                     | IIIA                  | -0.318        | -0.905           | -1.770                 | -7.320    | -33.986    | -1.476      | -35.462      | 4.800           | -45.147      | 0         | -6.367        | -0.111      |
| 1                                                                                            | IIA-IIIA              | -0.271        | -0.723           | -1.304                 | -5.145    | -25.912    | 0.049       | -25.863      | 0.325           | -29.973      | -0.697    | -3.854        | 0.004       |
| 2                                                                                            | IIA-IIIA              | -0.233        | -0.633           | -1.168                 | -4.666    | -27.806    | -0.203      | -28.010      | 0.000           | -35.104      | 0.000     | -4.079        | -0.015      |
| Ibuprofen                                                                                    | IIIA                  | -0.287        | -0.707           | -1.159                 | -4.298    | -20.072    | -5.986      | -26.058      | 1.780           | -33.284      | -1.111    | -2.381        | -0.449      |
| <b>2BXF - Diazepam bound in subdomain IIIA (Sudlow's Site II)</b>                            |                       |               |                  |                        |           |            |             |              |                 |              |           |               |             |
| Ibuprofen                                                                                    | IIA                   | -0.528        | -1.302           | -2.136                 | -7.922    | -23.084    | -5.223      | -28.307      | 4.642           | -39.436      | -0.695    | -2.911        | -0.392      |
| 2                                                                                            | IIIA                  | -0.248        | -0.674           | -1.243                 | -4.967    | -25.346    | -0.204      | -25.551      | 0.000           | -33.215      | 0.000     | -2.550        | -0.015      |
| 1                                                                                            | IIIA                  | -0.106        | -0.284           | -0.513                 | -2.023    | -22.867    | -1.419      | -24.286      | 0.324           | -31.138      | 0.000     | -1.879        | -0.106      |
|                                                                                              | IB-IIIA               |               |                  |                        |           |            |             |              |                 |              |           |               |             |
| Warfarin                                                                                     | cleft                 | -0.185        | -0.526           | -1.029                 | -4.257    | -34.837    | -2.655      | -37.492      | 4.110           | -49.074      | -0.819    | -3.158        | -0.199      |
| Diazepam                                                                                     | IIA-IIB               | -0.190        | -0.515           | -0.949                 | -3.793    | -34.404    | -1.145      | -35.549      | 0.175           | -43.894      | -0.123    | -3.024        | -0.086      |

2BXG - 2x ibuprofen bound, one in subdomain IIIA (Sudlow's Site II) and the second between subdomains IIA and IIB

|           |         |        |        |        |        |         |        |         |       |         |        |        |        |
|-----------|---------|--------|--------|--------|--------|---------|--------|---------|-------|---------|--------|--------|--------|
|           | IIA-    |        |        |        |        |         |        |         |       |         |        |        |        |
| Ibuprofen | Trp214  | -0.529 | -1.304 | -2.139 | -7.932 | -19.805 | -3.976 | -23.781 | 0     | -27.136 | 0      | -3.243 | -0.298 |
| 2         | IA-IIA  | -0.240 | -0.651 | -1.200 | -4.795 | -22.218 | 0.478  | -21.739 | 0.000 | -30.041 | 0.000  | -2.549 | 0.036  |
| 1         | IA-IIA  | -0.242 | -0.645 | -1.164 | -4.593 | -22.051 | -0.508 | -22.559 | 0.324 | -29.124 | 0.000  | -2.392 | -0.038 |
|           | IB-IIIA |        |        |        |        |         |        |         |       |         |        |        |        |
| Warfarin  | cleft   | -0.197 | -0.560 | -1.094 | -4.525 | -31.451 | -8.021 | -39.472 | 4.671 | -53.459 | -1.341 | -2.360 | -0.602 |
|           | IB-IIIA |        |        |        |        |         |        |         |       |         |        |        |        |
| Diazepam  | cleft   | -0.180 | -0.490 | -0.903 | -3.610 | -28.813 | -0.407 | -29.220 | 0.369 | -40.636 | 0      | -3.212 | -0.031 |

**Table S8.** Summary of Glide XP docking scores (as in Table S7) and selected interaction distances for HSA targets prepared from ligand-free grids based on geometry-optimized (prepared) structures derived from PDB codes 1HA2 (HSA•{warfarin} complex) and 2BXF (HSA•{diazepam} complex). The docking runs were truncated to report only the top-scoring ligand pose for each ligand. All energies are in units of kcal mol<sup>-1</sup>.

| Ligand or drug                                                                               | Binding site location <sup>a</sup> | XP GScore | Distance to Trp-214 (Å) <sup>b</sup> | Closest tyrosine residues (Å) <sup>b</sup>     | Closest phenylalanine residues (Å) <sup>b</sup> |
|----------------------------------------------------------------------------------------------|------------------------------------|-----------|--------------------------------------|------------------------------------------------|-------------------------------------------------|
| <b>1HA2 - No warfarin bound in subdomain IIA of protein docking grid (Sudlow's Site I)</b>   |                                    |           |                                      |                                                |                                                 |
| Ibuprofen                                                                                    | IA                                 | -8.001    | 30.4                                 | Tyr-30 (10.8), Tyr-150 (13.6), Tyr-148 (18.0)  | Phe-19 (5.6), Phe-27 (7.5), Phe-49 (9.1)        |
| Warfarin                                                                                     | IIA                                | -7.513    | 5.3                                  | Tyr-150 (9.5), Tyr-263 (11.3), Tyr-452 (17.0)  | Phe-211 (5.9), Phe-223 (8.3)                    |
| Diazepam                                                                                     | IIA-IIB                            | -5.019    | 11.3                                 | Tyr-353 (11.9), Tyr-319 (12.2), Tyr-334 (13.9) | Phe-206 (5.2), Phe-211 (11.3), Phe-330 (11.1)   |
| <b>1</b>                                                                                     | IA-IIA                             | -4.843    | 11,6                                 | Tyr-319 (12,4), Tyr-334 (16,7), Tyr-263 (16)   | Phe-228 (7,7), Phe-326 (9), Phe-263 (10.1)      |
| <b>2</b>                                                                                     | IA-IIA                             | -4.617    | 9,6                                  | Tyr-319 (11.8), Tyr-332 (10,2), Tyr-334 (15)   | Phe-228 (8,6), Phe-326 (9), Phe-211 (10,1)      |
| <b>2BXF - No diazepam bound in subdomain IIIA of protein docking grid (Sudlow's Site II)</b> |                                    |           |                                      |                                                |                                                 |
| Diazepam                                                                                     | IIIA                               | -9.032    | 17.0                                 | Tyr-411 (9.5), Tyr-452 (9.6), Tyr-341 (13.4)   | Phe-403 (6.0), Phe-395 (9.0), Phe-488 (12.5)    |
| Warfarin                                                                                     | IIIA                               | -7.320    | 17.0                                 | Tyr-452 (9.5), Tyr-411 (10.4), Tyr-341 (13.3)  | Phe-403 (5.3), Phe-395 (7.8), Phe-488 (12.2)    |
| <b>2</b>                                                                                     | IIIA                               | -5.145    | 29.0                                 | Tyr-370 (7.1), Tyr-353 (9,5), Tyr-319 (12.0)   | Phe-403 (5.3), Phe-395 (7.8), Phe-488 (12.2)    |
| <b>1</b>                                                                                     | IIIA                               | -4.666    | 30.0                                 | Tyr-370 (5.9), Tyr-353 (9.6), Tyr-319 (11.3)   | Phe-374 (13.7), Phe-309 (14.1), Phe-377 (14.4)  |
| Ibuprofen                                                                                    | IIIA                               | -4.298    | 20.9                                 | Tyr-411 (6.0), Tyr-452 (12.1), Tyr-341(19.3)   | Phe-309 (12.1), Phe-374 (14.3), Phe-353 (14.0)  |

<sup>a</sup> Binding site regions (see **Footnote Figure** overleaf) are defined according to Figure 7 in the paper by Ghuman *et al.*<sup>27</sup> <sup>b</sup> Distance measured between the closest ring centroid pair of the ligand and residue. For metal chelates, the distance to the metal ion from the closest ring centroid is given.

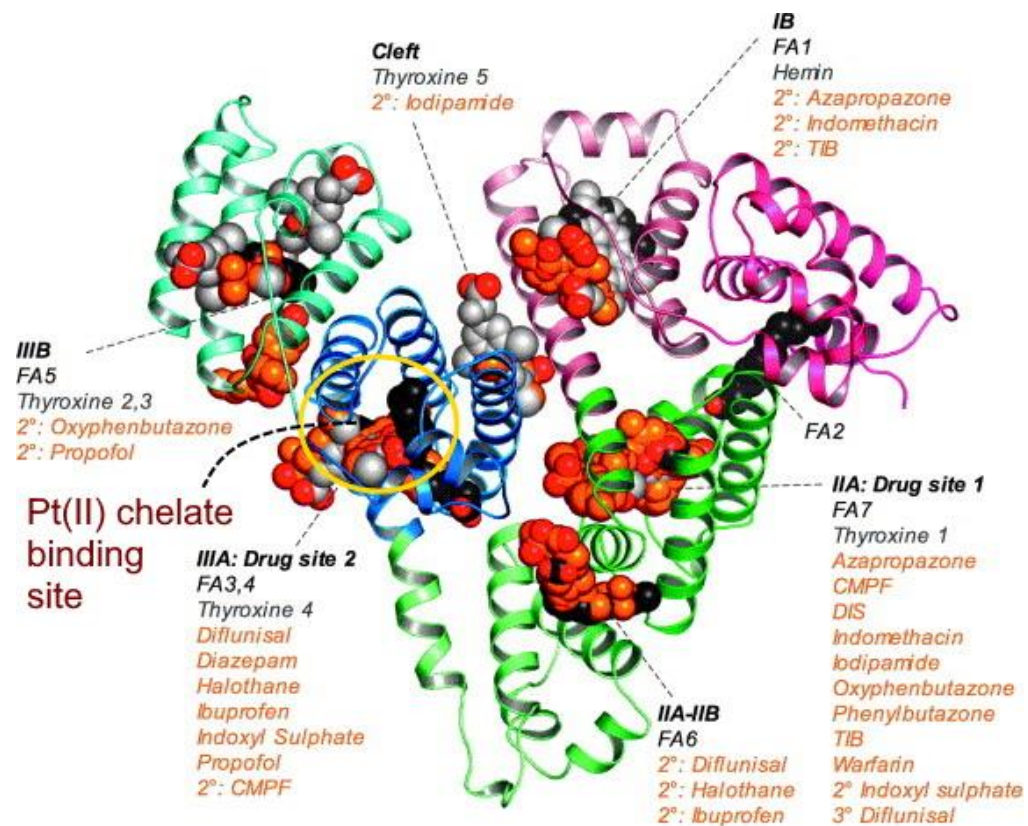

**Footnote Figure:** Modified from Figure 7 of Ghuman et al.<sup>27</sup>; “Summary of the ligand binding capacity of HSA as defined by crystallographic studies to date. Ligands are depicted in space-filling representation; oxygen atoms are coloured red; all other atoms in fatty acids (myristic acid), other endogenous ligands (hemin, thyroxin), and drugs are coloured dark grey, light grey, and orange, respectively.” The yellow ellipse indicates where the most probable binding site is located for the Pt(II) chelates in the present docking and spectroscopic studies.

## 9. Extended TD-DFT electronic structure data for 1

**Table S9.** Full list of 60 TD-DFT-calculated excited singlet states (CAM-B3LYP/DEF2-QZVP/GD3BJ in a DMSO solvent continuum) for **1**. Six of the frontier MOs relevant for assignment of the transitions are shown in the first two rows; the last row of the table plots the calculated spectral envelope. State energies are uncorrected. DMSO was chosen as the solvent medium to allow assignment of both the NMR and UV-vis spectra of **1**.

| 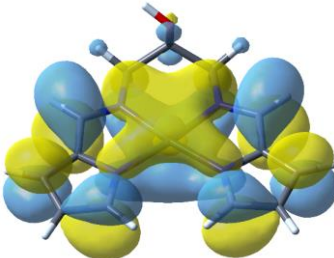  |                 |   |                    |   |                |               |
|------------------------------------------------------------------------------------|-----------------|------------------------------------------------------------------------------------|--------------------|--------------------------------------------------------------------------------------|----------------|---------------|
| LUMO, L (-0.707 eV)                                                                |                 | HOMO, H (-6.988 eV)                                                                |                    | HOMO-1 (-7.095 eV)                                                                   |                |               |
|  |                 |  |                    |  |                |               |
| HOMO-2 (-7.618 eV)                                                                 |                 | HOMO-3 (-8.042 eV)                                                                 |                    | HOMO-4 (-8.154 eV)                                                                   |                |               |
| Energy (cm <sup>-1</sup> )                                                         | Wavelength (nm) | Oscillator Strength                                                                | Major contribution | Top three minor contributions                                                        |                |               |
| 27,768.1                                                                           | 360.1           | 0.1316                                                                             | HOMO→LUMO (86%)    | H-3→LUMO (4%)                                                                        | H-2→L+1 (4%)   | H-1→L+1 (2%)  |
| 30,482.9                                                                           | 328.1           | 0.2577                                                                             | H-1→LUMO (77%)     | HOMO→L+1 (18%)                                                                       |                |               |
| 32,012.1                                                                           | 312.4           | 0.1003                                                                             | H-2→LUMO (54%)     | H-1→LUMO (10%)                                                                       | HOMO→L+1 (29%) | H-3→L+1 (4%)  |
| 34,906.9                                                                           | 286.5           | 0.0119                                                                             | H-4→LUMO (97%)     |                                                                                      |                |               |
| 36,605.5                                                                           | 273.2           | 0.3798                                                                             | H-3→LUMO (32%)     | H-1→L+1 (57%)                                                                        | H-2→L+1 (7%)   |               |
| 36,934.5                                                                           | 270.7           | 0.0007                                                                             | HOMO→L+4 (32%)     | HOMO→L+6 (14%)                                                                       | H-5→L+4 (6%)   | H-5→L+6 (3%)  |
| 38,035.5                                                                           | 262.9           | 0.0543                                                                             | H-4→L+4 (10%)      | H-2→LUMO (33%)                                                                       | HOMO→L+1 (27%) | H-5→L+1 (4%)  |
| 38,605.7                                                                           | 259.0           | 0.007                                                                              | H-2→L+4 (13%)      | H-1→L+4 (27%)                                                                        | H-1→L+6 (11%)  | H-7→L+4 (6%)  |
| 38,899.3                                                                           | 257.1           | 0.0308                                                                             | H-4→L+4 (32%)      | H-4→L+6 (16%)                                                                        | HOMO→L+1 (14%) | H-4→L+1 (4%)  |
| 39,903.5                                                                           | 250.6           | 0.0007                                                                             | H-4→L+1 (92%)      |                                                                                      |                |               |
| 40,505.2                                                                           | 246.9           | 0.1256                                                                             | H-3→LUMO (53%)     | H-2→L+1 (13%)                                                                        | H-1→L+1 (20%)  | H-7→L+1 (4%)  |
| 41,953.7                                                                           | 238.4           | 0.1572                                                                             | H-5→LUMO (14%)     | H-2→L+1 (57%)                                                                        | H-1→L+1 (16%)  | H-3→LUMO (3%) |
| 43,474.1                                                                           | 230.0           | 0.0001                                                                             | H-6→LUMO (80%)     | H-5→LUMO (12%)                                                                       |                |               |
| 44,019.3                                                                           | 227.2           | 0.0027                                                                             | H-7→LUMO           | H-3→L+1 (64%)                                                                        | H-1→LUMO       | H-1→L+3 (2%)  |

|                 |       |        |                 |                 |                |                |
|-----------------|-------|--------|-----------------|-----------------|----------------|----------------|
|                 |       |        | (16%)           |                 | (2%)           |                |
| <b>44,750.9</b> | 223.5 | 0.0005 | H-6→L+3 (10%)   | H-6→L+4 (37%)   | H-6→L+6 (19%)  | H-6→L+2 (6%)   |
| <b>46,401.9</b> | 215.5 | 0.0251 | HOMO→L+2 (27%)  | HOMO→L+3 (28%)  | HOMO→L+5 (21%) | H-2→L+4 (3%)   |
| <b>47,046.3</b> | 212.6 | 0.0264 | HOMO→L+3 (41%)  | HOMO→L+5 (17%)  | H-2→L+4 (5%)   | H-1→L+2 (5%)   |
| <b>47,295.5</b> | 211.4 | 0.0036 | H-1→L+2 (17%)   | H-1→L+3 (13%)   | H-1→L+5 (32%)  | HOMO→L+6 (11%) |
| <b>47,648.0</b> | 209.9 | 0.0081 | H-7→L+1 (11%)   | H-6→LUMO (12%)  | H-5→LUMO (57%) | H-2→L+1 (9%)   |
| <b>48,027.9</b> | 208.2 | 0.0264 | H-1→L+3 (49%)   | H-1→L+4 (14%)   | H-3→L+1 (3%)   | H-2→L+3 (5%)   |
| <b>48,228.7</b> | 207.3 | 0.0026 | H-2→L+4 (20%)   | H-2→L+6 (14%)   | H-1→L+4 (11%)  | H-1→L+6 (11%)  |
| <b>48,480.4</b> | 206.3 | 0.001  | H-7→LUMO (56%)  | H-5→L+1 (20%)   | H-6→L+1 (2%)   | H-3→L+1 (8%)   |
| <b>49,000.6</b> | 204.1 | 0.0002 | H-6→L+1 (73%)   | H-5→L+1 (13%)   |                |                |
| <b>50,045.1</b> | 199.8 | 0.0012 | H-3→L+4 (21%)   | H-3→L+6 (13%)   | H-6→L+1 (7%)   | H-5→L+4 (3%)   |
| <b>50,387.9</b> | 198.5 | 0.0029 | H-2→L+5 (25%)   | H-1→L+5 (11%)   | HOMO→L+6 (28%) | H-3→L+4 (5%)   |
| <b>50,485.5</b> | 198.1 | 0.0234 | HOMO→L+2 (26%)  | HOMO→L+4 (15%)  | HOMO→L+5 (27%) | H-2→L+5 (6%)   |
| <b>51,514.6</b> | 194.1 | 0.0043 | H-3→L+5 (13%)   | H-1→L+2 (13%)   | H-1→L+6 (38%)  | H-3→L+2 (5%)   |
| <b>51,558.2</b> | 194.0 | 0.008  | H-1→L+2 (25%)   | H-1→L+4 (16%)   | H-1→L+5 (20%)  | H-3→L+5 (3%)   |
| <b>52,395.4</b> | 190.9 | 0.0459 | H-10→LUMO (16%) | H-9→LUMO (33%)  | H-8→LUMO (15%) | H-4→L+3 (14%)  |
| <b>52,529.3</b> | 190.4 | 0.0002 | H-2→L+3 (60%)   | H-2→L+4 (11%)   | H-2→L+2 (6%)   | H-1→L+3 (5%)   |
| <b>52,911.6</b> | 189.0 | 0.0734 | H-10→LUMO (28%) | H-8→LUMO (15%)  | H-4→L+3 (28%)  | H-9→LUMO (3%)  |
| <b>53,076.1</b> | 188.4 | 0.0481 | H-9→LUMO (45%)  | H-4→L+3 (23%)   | H-10→LUMO (7%) | H-9→L+1 (3%)   |
| <b>54,298.1</b> | 184.2 | 0.0665 | HOMO→L+10 (10%) | H-7→LUMO (5%)   | H-5→L+1 (5%)   | H-3→L+3 (4%)   |
| <b>54,339.2</b> | 184.0 | 0.0591 | H-3→L+3 (13%)   | HOMO→L+9 (13%)  | H-7→L+1 (4%)   | H-5→LUMO (2%)  |
| <b>54,633.6</b> | 183.0 | 0.0312 | H-2→L+5 (15%)   | H-8→LUMO (3%)   | H-7→LUMO (7%)  | H-5→L+1 (9%)   |
| <b>55,001.4</b> | 181.8 | 0.0116 | H-2→L+6 (12%)   | HOMO→L+7 (25%)  | H-7→L+1 (4%)   | H-4→L+2 (2%)   |
| <b>55,143.3</b> | 181.3 | 0.1163 | H-10→LUMO (19%) | H-8→LUMO (45%)  | H-8→L+1 (3%)   | H-5→L+1 (2%)   |
| <b>55,286.9</b> | 180.9 | 0.0143 | HOMO→L+7 (16%)  | HOMO→L+10 (11%) | H-7→L+1 (9%)   | H-4→L+5 (2%)   |
| <b>55,499.8</b> | 180.2 | 0.0271 | H-2→L+6 (15%)   | HOMO→L+7 (14%)  | HOMO→L+8 (19%) | H-5→L+5 (4%)   |
| <b>55,601.4</b> | 179.9 | 0.0923 | H-5→L+1 (36%)   | H-8→LUMO (9%)   | H-7→LUMO (5%)  | H-6→L+1 (7%)   |
| <b>55,782.9</b> | 179.3 | 0.0234 | H-7→L+1 (12%)   | H-3→L+3 (28%)   | H-4→L+2 (8%)   | H-4→L+4 (2%)   |
| <b>56,207.2</b> | 177.9 | 0.0012 | H-2→L+2 (35%)   | H-2→L+4 (10%)   | H-2→L+7 (5%)   | H-2→L+8 (2%)   |
| <b>56,676.6</b> | 176.4 | 0.0002 | H-1→L+8 (39%)   | HOMO→L+13 (10%) | H-3→L+6 (8%)   | H-2→L+2 (2%)   |
| <b>56,916.1</b> | 175.7 | 0.1546 | H-2→L+10 (12%)  | HOMO→L+16 (16%) | H-3→L+16 (4%)  | H-2→L+9 (8%)   |
| <b>57,029.9</b> | 175.3 | 0.0552 | H-1→L+7 (32%)   | H-7→L+1 (2%)    | H-3→L+4 (2%)   | H-3→L+6 (7%)   |
| <b>57,044.4</b> | 175.3 | 0.0029 | H-7→L+1 (39%)   | H-4→L+2 (19%)   | H-5→LUMO (4%)  | H-4→L+4 (5%)   |
| <b>57,189.5</b> | 174.9 | 0.0201 | H-3→L+5 (21%)   | H-3→L+8 (3%)    | H-2→L+4 (5%)   | H-2→L+6 (7%)   |
| <b>57,369.4</b> | 174.3 | 0.0023 | H-10→LUMO       | H-10→L+1        | H-9→L+1        | H-8→L+1        |



|                 |       |        | (10%)          | (34%)          | (18%)          | (14%)          |
|-----------------|-------|--------|----------------|----------------|----------------|----------------|
| <b>57,659.8</b> | 173.4 | 0.0019 | H-10→L+1 (13%) | H-9→L+1 (48%)  | H-20→LUMO (3%) | H-15→LUMO (5%) |
| <b>57,983.2</b> | 172.5 | 0.0386 | H-3→L+2 (13%)  | H-1→L+16 (12%) | H-4→L+2 (4%)   | H-3→L+4 (2%)   |
| <b>58,324.4</b> | 171.5 | 0.0029 | H-3→L+5 (16%)  | H-1→L+13 (12%) | H-7→L+4 (6%)   | H-1→L+6 (8%)   |
| <b>58,439.7</b> | 171.1 | 0.0038 | H-2→L+2 (13%)  | H-5→L+3 (2%)   | H-5→L+4 (8%)   | H-3→L+4 (4%)   |
| <b>58,499.4</b> | 170.9 | 0.025  |                | H-4→L+2 (7%)   | H-4→L+5 (4%)   | H-3→L+2 (5%)   |
| <b>58,747.8</b> | 170.2 | 0.0285 | H-4→L+5 (28%)  | H-8→L+2 (4%)   | H-4→L+2 (7%)   | H-3→L+4 (3%)   |
| <b>58,884.1</b> | 169.8 | 0.0237 | H-4→L+5 (16%)  | HOMO→L+9 (11%) | H-5→L+4 (2%)   | H-4→L+2 (6%)   |
| <b>59,516.5</b> | 168.0 | 0.0136 | H-7→L+4 (18%)  | H-2→L+6 (15%)  | H-7→L+2 (3%)   | H-7→L+3 (5%)   |
| <b>59,824.6</b> | 167.2 | 0.0141 | H-3→L+2 (25%)  | H-10→L+1 (2%)  | H-8→L+1 (6%)   | H-8→L+2 (3%)   |
| <b>59,944.7</b> | 166.8 | 0.0537 |                | H-4→L+6 (2%)   | H-3→L+6 (4%)   | H-2→L+7 (9%)   |
| <b>60,174.6</b> | 166.2 | 0.0176 | H-8→L+1 (26%)  | H-10→L+1 (8%)  | H-8→L+2 (3%)   | H-2→L+7 (5%)   |
| <b>60,227.8</b> | 166.0 | 0.0344 | H-8→L+1 (19%)  | H-10→L+1 (5%)  | H-3→L+2 (3%)   | H-3→L+6 (4%)   |

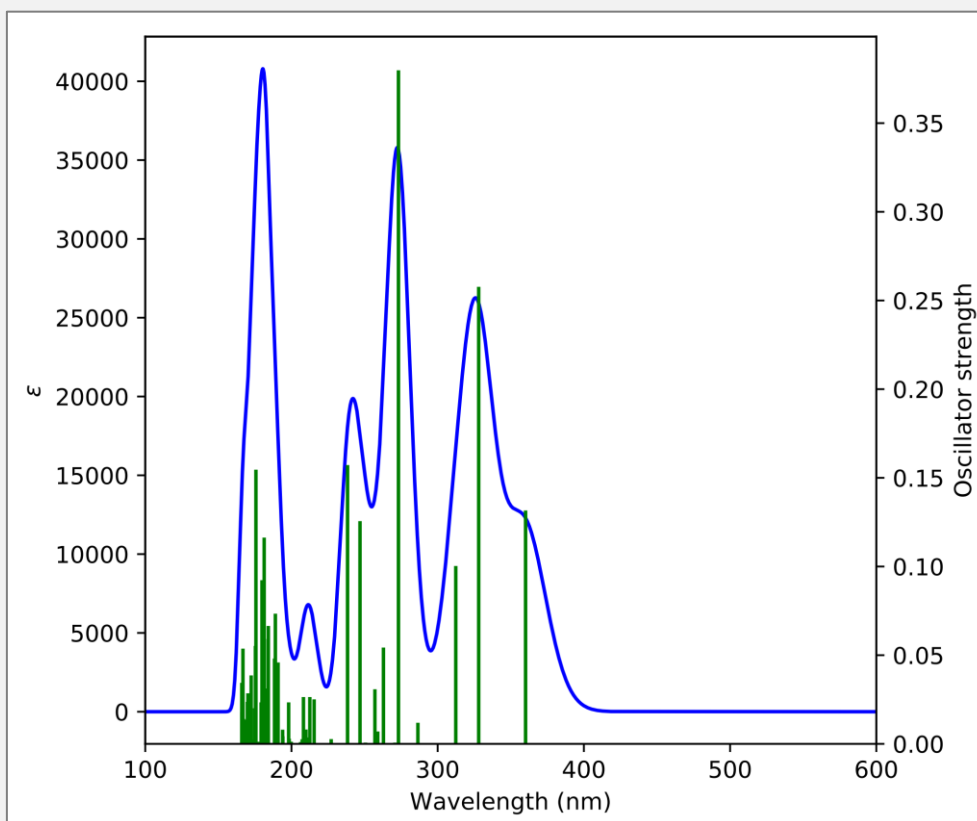

**Table S10.** Atomic (Cartesian) coordinates for the DFT-calculated structure of **1** (CAM-B3LYP/DEF2-QZVP/GD3BJ; DMSO solvent continuum).

| atom | x       | y       | z       |
|------|---------|---------|---------|
| Pt   | 0.0007  | 0.0498  | 0.1403  |
| O    | 0.0602  | -3.0099 | -1.5781 |
| H    | -0.6797 | -3.4421 | -2.0113 |
| N    | 1.6098  | 1.2681  | -0.017  |
| N    | 1.4944  | -1.3043 | 0.2343  |
| N    | -1.5028 | -1.2939 | 0.2362  |
| N    | -1.6002 | 1.2797  | -0.0148 |
| C    | -3.2601 | 2.7682  | -0.234  |
| H    | -3.7641 | 3.7133  | -0.3398 |
| C    | 2.6843  | -0.8234 | 0.1073  |
| H    | 3.5494  | -1.4765 | 0.1138  |
| C    | 1.2739  | -2.7217 | 0.4443  |
| H    | 1.2223  | -2.92   | 1.5159  |
| H    | 2.1153  | -3.2827 | 0.0402  |
| C    | -2.7963 | 0.5991  | -0.0256 |
| C    | -0.0067 | -3.2465 | -0.1839 |
| H    | -0.0089 | -4.3215 | 0.0147  |
| C    | -2.6895 | -0.8039 | 0.111   |
| H    | -3.5595 | -1.4504 | 0.1186  |
| C    | -3.846  | 1.5033  | -0.1621 |
| H    | -4.8946 | 1.2625  | -0.2005 |
| C    | 3.2796  | 2.7451  | -0.238  |
| H    | 3.7902  | 3.6866  | -0.3441 |
| C    | 2.8011  | 0.5792  | -0.0297 |
| C    | 3.8568  | 1.4758  | -0.1673 |
| H    | 4.9036  | 1.2277  | -0.2072 |
| C    | -1.2915 | -2.7123 | 0.4427  |
| H    | -2.1391 | -3.267  | 0.0391  |
| H    | -1.2468 | -2.9178 | 1.514   |
| C    | -1.8789 | 2.5825  | -0.1412 |
| H    | -1.1023 | 3.327   | -0.1611 |
| C    | 1.8975  | 2.5692  | -0.1434 |
| H    | 1.126   | 3.319   | -0.1617 |

**Table S11.** Atomic (Cartesian) coordinates for the DFT-calculated structure of **1** (CAM-B3LYP/DEF2-QZVP/GD3BJ; water solvent continuum).

| atom | x       | y       | z       |
|------|---------|---------|---------|
| Pt   | 0.0008  | -0.0499 | -0.14   |
| O    | 0.0577  | 3.0095  | 1.5783  |
| H    | -0.6823 | 3.4423  | 2.0108  |
| N    | 1.6108  | -1.2676 | 0.0171  |
| N    | 1.4939  | 1.305   | -0.2342 |
| N    | -1.5032 | 1.2934  | -0.2367 |
| N    | -1.6    | -1.2804 | 0.0152  |
| C    | -3.2595 | -2.7694 | 0.234   |
| H    | -3.7633 | -3.7147 | 0.3395  |
| C    | 2.6841  | 0.8249  | -0.1075 |
| H    | 3.5488  | 1.4783  | -0.1144 |
| C    | 1.2728  | 2.7224  | -0.4441 |
| H    | 1.2209  | 2.9206  | -1.5157 |
| H    | 2.114   | 3.2837  | -0.0401 |
| C    | -2.7963 | -0.6001 | 0.0257  |
| C    | -0.0083 | 3.2464  | 0.1838  |
| H    | -0.0108 | 4.3215  | -0.0145 |
| C    | -2.6899 | 0.8031  | -0.1114 |
| H    | -3.5599 | 1.4495  | -0.1193 |
| C    | -3.8457 | -1.5045 | 0.1619  |
| H    | -4.8944 | -1.2637 | 0.1999  |
| C    | 3.2814  | -2.7438 | 0.2372  |
| H    | 3.7926  | -3.6851 | 0.3428  |
| C    | 2.8016  | -0.5779 | 0.0296  |
| C    | 3.8578  | -1.474  | 0.1665  |
| H    | 4.9046  | -1.2251 | 0.2059  |
| C    | -1.2924 | 2.7118  | -0.4435 |
| H    | -2.1407 | 3.2662  | -0.041  |
| H    | -1.2469 | 2.9169  | -1.5149 |
| C    | -1.8784 | -2.5835 | 0.1415  |
| H    | -1.1016 | -3.3278 | 0.1613  |
| C    | 1.8992  | -2.5687 | 0.143   |
| H    | 1.1282  | -3.319  | 0.1614  |

## 10. References

- 1 O. V. Dolomanov, L. J. Bourhis, R. J. Gildea, J. A. K. Howard and H. Puschmann, *J. Appl. Crystallogr.*, 2009, **42**, 339–341.
- 2 G. M. Sheldrick, *Acta Crystallogr. Sect. Found. Adv.*, 2015, **71**, 3–8.
- 3 G. M. Sheldrick, *Acta Crystallogr. Sect. C Struct. Chem.*, 2015, **71**, 3–8.
- 4 X.-F. Shan, D.-H. Wang, C.-H. Tung and L.-Z. Wu, *Tetrahedron*, 2008, **64**, 5577–5582.
- 5 M. Van de Weert and L. Stella, *J. Mol. Struct.*, 2011, **998**, 144–150.
- 6 M. van de Weert, *J. Fluoresc.*, 2010, **20**, 625–629.
- 7 P. Geladi and B. R. Kowalski, *Anal. Chim. Acta*, 1986, **185**, 1–17.
- 8 J. G. Lees, A. J. Miles, R. W. Janes and B. A. Wallace, *BMC Bioinformatics*, 2006, **7**, 507.
- 9 J. T. Yang, C.-S. C. Wu and H. M. Martinez, in *Methods in Enzymology*, Academic Press, 1986, vol. 130, pp. 208–269.
- 10 T. Shiratori, S. Goto, T. Sakaguchi, T. Kasai, Y. Otsuka, K. Higashi, K. Makino, H. Takahashi and K. Komatsu, *Biochem. Biophys. Rep.*, 2021, **28**, 101153.
- 11 A. Micsonai, F. Wien, É. Bulyáki, J. Kun, É. Moussong, Y.-H. Lee, Y. Goto, M. Réfrégiers and J. Kardos, *Nucleic Acids Res.*, 2018, **46**, W315–W322.
- 12 S. Sookai and O. Munro, , DOI:10.26434/chemrxiv-2022-8v4x2.
- 13 M. J. Frisch, G. W. Trucks, H. B. Schlegel, G. E. Scuseria, M. A. Robb, J. R. Cheeseman, G. Scalmani, V. Barone, G. A. Petersson, H. Nakatsuji, X. Li, M. Caricato, A. V. Marenich, J. Bloino, B. G. Janesko, R. Gomperts, B. Mennucci, H. P. Hratchian, J. V. Ortiz, A. F. Izmaylov, J. L. Sonnenberg, D. Williams-Young, F. Ding, F. Lipparini, F. Egidi, J. Goings, B. Peng, A. Petrone, T. Henderson, D. Ranasinghe, V. G. Zakrzewski, J. Gao, N. Rega, G. Zheng, W. Liang, M. Hada, M. Ehara, K. Toyota, R. Fukuda, J. Hasegawa, M. Ishida, T. Nakajima, Y. Honda, O. Kitao, H. Nakai, T. Vreven, K. Throssell, J. A. Montgomery Jr., J. E. Peralta, F. Ogliaro, M. J. Bearpark, J. J. Heyd, E. N. Brothers, K. N. Kudin, V. N. Staroverov, T. A. Keith, R. Kobayashi, J. Normand, K. Raghavachari, A. P. Rendell, J. C. Burant, S. S. Iyengar, J. Tomasi, M. Cossi, J. M. Millam, M. Klene, C. Adamo, R. Cammi, J. W. Ochterski, R. L. Martin, K. Morokuma, O. Farkas, J. B. Foresman and D. J. Fox, *Gaussian 16 Revision C.01*, 2016.
- 14 T. Yanai, D. P. Tew and N. C. Handy, *Chem. Phys. Lett.*, 2004, **393**, 51–57.
- 15 F. Weigend and R. Ahlrichs, *Phys. Chem. Chem. Phys.*, 2005, **7**, 3297–3305.
- 16 S. Grimme, S. Ehrlich and L. Goerigk, *J. Comput. Chem.*, 2011, **32**, 1456–1465.
- 17 P. Fuentealba, H. Preuss, H. Stoll and L. Von Szentpály, *Chem. Phys. Lett.*, 1982, **89**, 418–422.
- 18 J. R. Cheeseman, G. W. Trucks, T. A. Keith and M. J. Frisch, *J. Chem. Phys.*, 1996, **104**, 5497–5509.
- 19 R. Ditchfield, *Mol. Phys.*, 1974, **27**, 789–807.
- 20 F. Lipparini, G. Scalmani, B. Mennucci, E. Cancès, M. Caricato and M. J. Frisch, *J. Chem. Phys.*, 2010, **133**, 014106.
- 21 R. Dennington, T. A. Keith and J. M. Millam, *GaussView Version 6*, 2019.
- 22 N. M. O’boyle, A. L. Tenderholt and K. M. Langner, *J. Comput. Chem.*, 2008, **29**, 839–845.
- 23 F. R. Clemente, T. Vreven and M. J. Frisch, in *Quantum Biochemistry*, John Wiley & Sons, Ltd, 2010, pp. 61–83.
- 24 A. K. Rappe, C. J. Casewit, K. S. Colwell, W. A. Goddard and W. M. Skiff, *J. Am. Chem. Soc.*, 1992, **114**, 10024–10035.
- 25 T. A. Halgren, R. B. Murphy, R. A. Friesner, H. S. Beard, L. L. Frye, W. T. Pollard and J. L. Banks, *J. Med. Chem.*, 2004, **47**, 1750–1759.
- 26 I. Petitpas, A. A. Bhattacharya, S. Twine, M. East and S. Curry, *J. Biol. Chem.*, 2001, **276**, 22804–22809.

- 27 J. Ghuman, P. A. Zunszain, I. Petitpas, A. A. Bhattacharya, M. Otagiri and S. Curry, *J. Mol. Biol.*, 2005, **353**, 38–52.
- 28 G. Madhavi Sastry, M. Adzhigirey, T. Day, R. Annabhimoju and W. Sherman, *J. Comput. Aided Mol. Des.*, 2013, **27**, 221–234.
- 29 F. Mohamadi, N. G. J. Richards, W. C. Guida, R. Liskamp, M. Lipton, C. Caufield, G. Chang, T. Hendrickson and W. C. Still, *J. Comput. Chem.*, 1990, **11**, 440–467.
- 30 W. L. Jorgensen and J. Tirado-Rives, *J. Am. Chem. Soc.*, 1988, **110**, 1657–1666.
- 31 G. A. Kaminski, R. A. Friesner, J. Tirado-Rives and W. L. Jorgensen, *J. Phys. Chem. B*, 2001, **105**, 6474–6487.
- 32 R. A. Friesner, J. L. Banks, R. B. Murphy, T. A. Halgren, J. J. Klicic, D. T. Mainz, M. P. Repasky, E. H. Knoll, M. Shelley, J. K. Perry, D. E. Shaw, P. Francis and P. S. Shenkin, *J. Med. Chem.*, 2004, **47**, 1739–1749.
- 33 J. R. Greenwood, D. Calkins, A. P. Sullivan and J. C. Shelley, *J. Comput. Aided Mol. Des.*, 2010, **24**, 591–604.
- 34 Z. Fakhar, B. Faramarzi, S. Pacifico and S. Faramarzi, *J. Biomol. Struct. Dyn.*, 2021, **39**, 6171–6183.
